# Supplementary material for: A PX-BAR protein Mvp1/SNX8 and a dynamin-like GTPase Vps1 drive endosomal recycling
Source: PubMed Central journal article supplement (PMC8504969; doi:10.7554/elife.69883), 2021-09-15

**Figure 6-supplemental 1A**

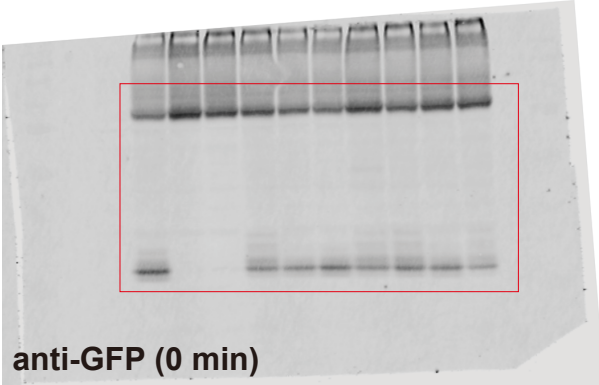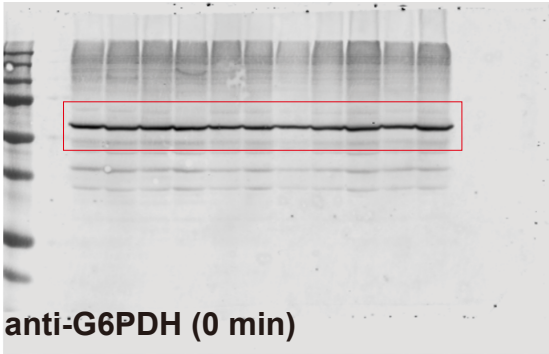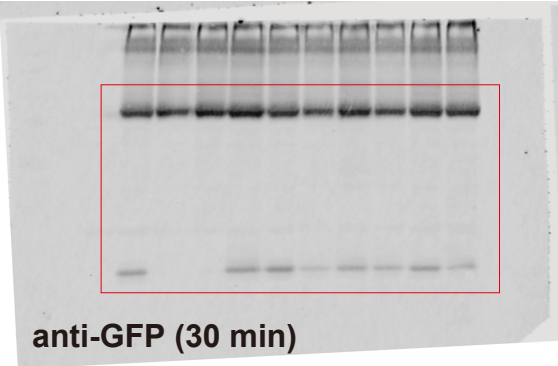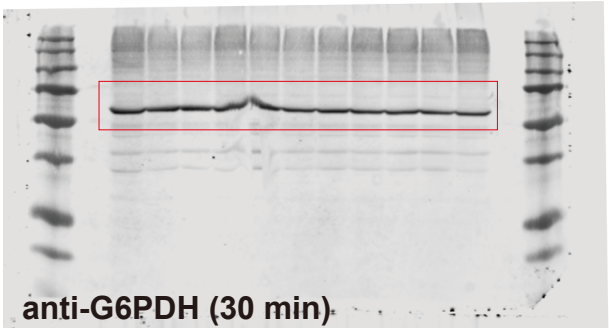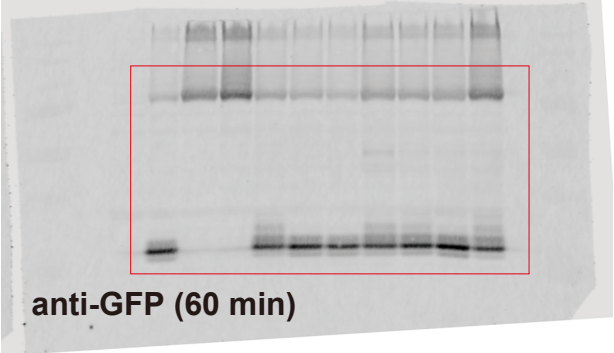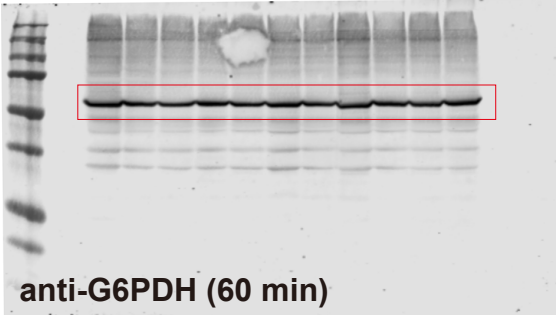

Supplement: elife-69883-fig6-figsupp1-data1.pdf [file elife-69883-fig6-figsupp1-data1.pdf]
