# Supplementary material for: A PX-BAR protein Mvp1/SNX8 and a dynamin-like GTPase Vps1 drive endosomal recycling
Source: eLife journal article supplement (doi:10.7554/elife.69883), 2021-09-15

Figure 2G

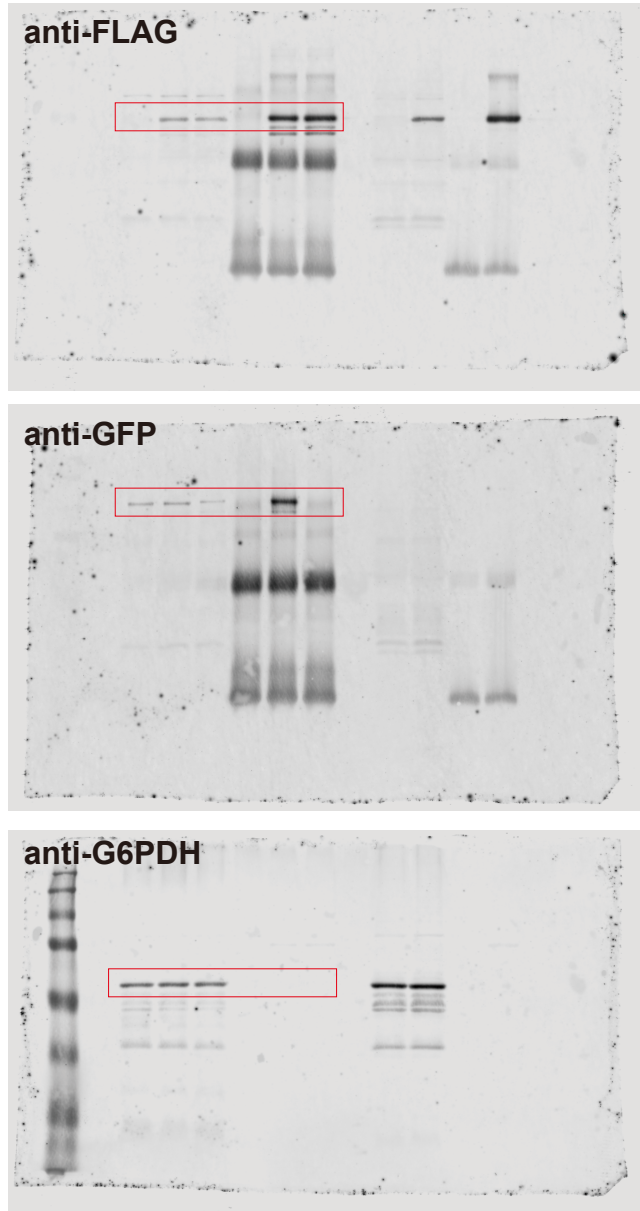

Supplement: fig2-data3 [file elife-69883-fig2-data3-v2.pdf]
