# Supplementary material for: A PX-BAR protein Mvp1/SNX8 and a dynamin-like GTPase Vps1 drive endosomal recycling
Source: eLife journal article supplement (doi:10.7554/elife.69883), 2021-09-15

**Figure 4L**

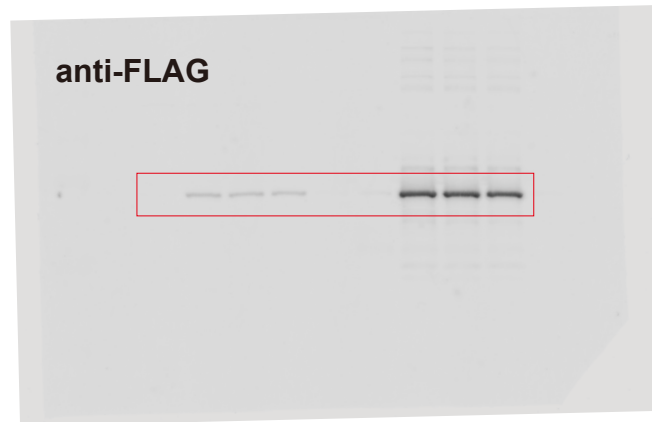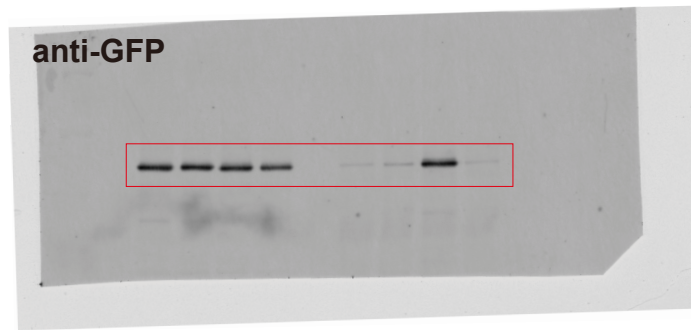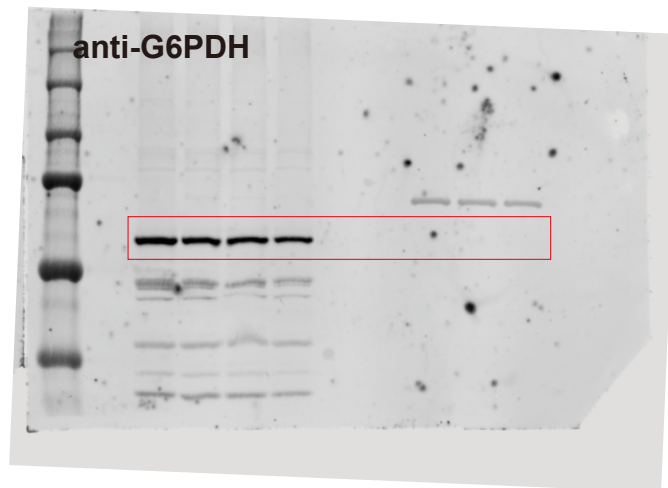

Supplement: fig4-data4 [file elife-69883-fig4-data4-v2.pdf]
