# Supplementary material for: A PX-BAR protein Mvp1/SNX8 and a dynamin-like GTPase Vps1 drive endosomal recycling
Source: eLife journal article supplement (doi:10.7554/elife.69883), 2021-09-15

Figure 5-supplemental 1A

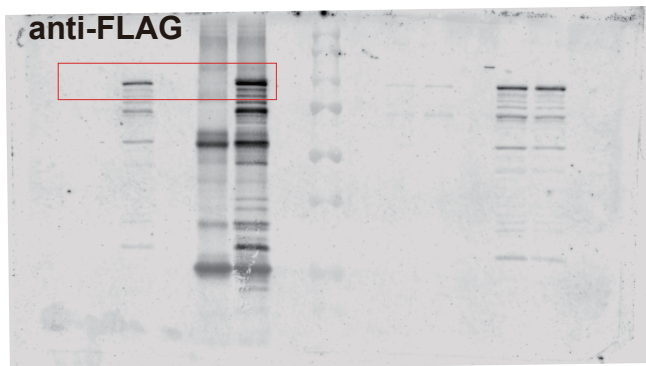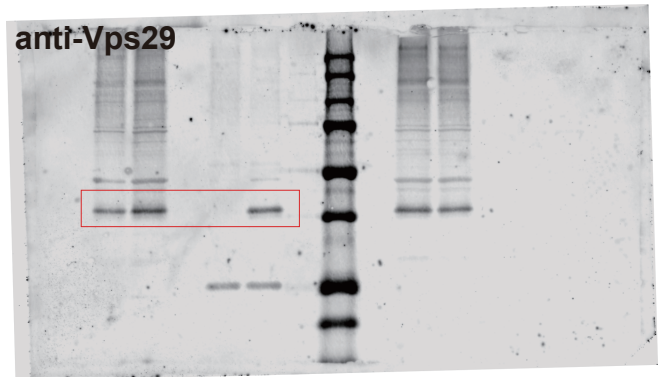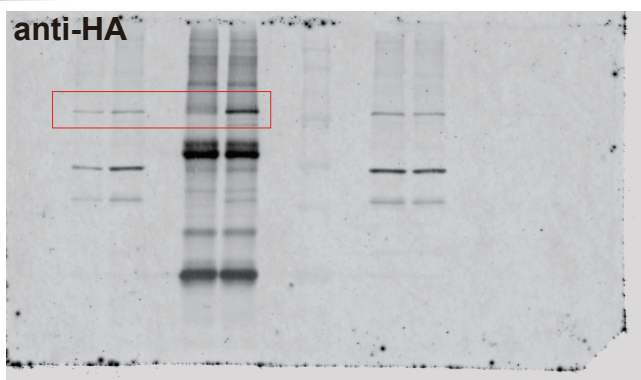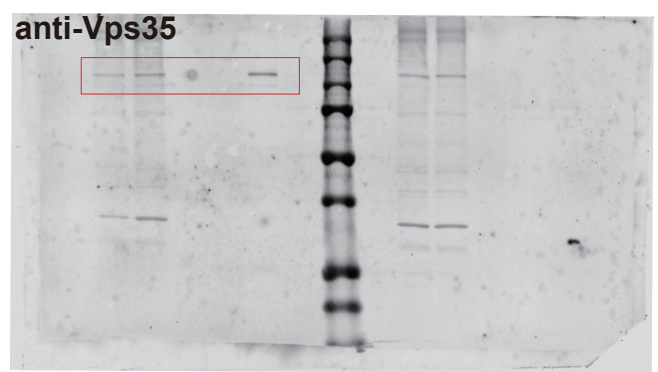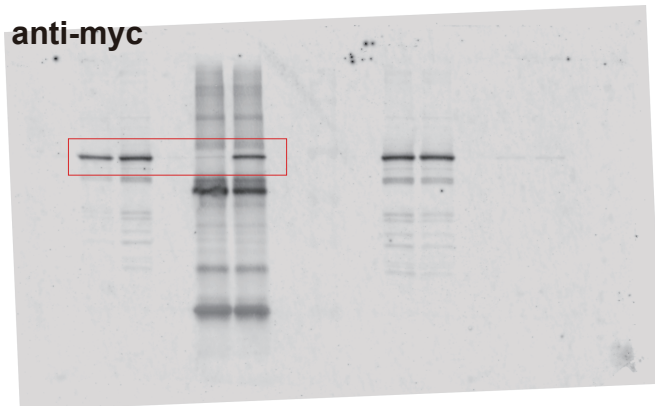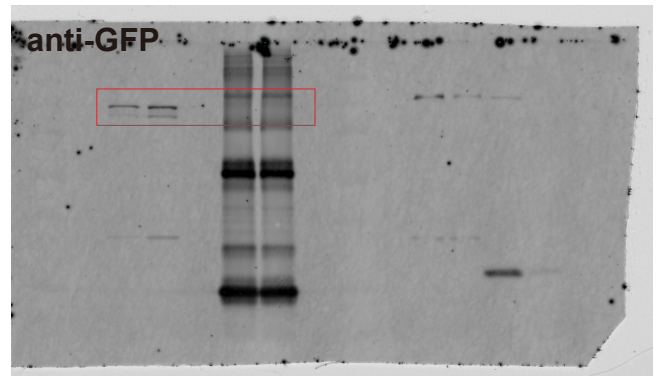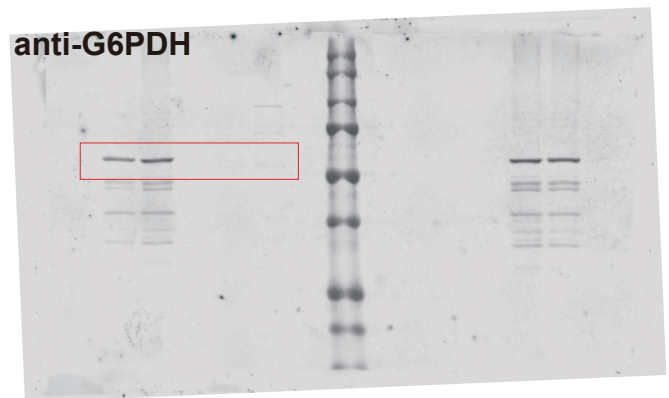

Supplement: fig5-figsupp1-data1 [file elife-69883-fig5-figsupp1-data1-v2.pdf]
