# Supplementary material for: A PX-BAR protein Mvp1/SNX8 and a dynamin-like GTPase Vps1 drive endosomal recycling
Source: eLife. 2021 Sep 15;10:e69883. doi: 10.7554/eLife.69883 (PMC8504969; doi:10.7554/eLife.69883)
Supplement: Figure 1—figure supplement 1—source data 1. [file elife-69883-fig1-figsupp1-data1.xlsx]

## Sheet: Sheet1
Figure 1-figure supplement1D
Vps55/x-mCherry (Manders' Coefficients)
	vs Sec7	vs Pep12
Sample 1	0.033	0.728
Sample 2	0.053	0.722
Sample 3	0.043	0.693
