# Supplementary material for: A PX-BAR protein Mvp1/SNX8 and a dynamin-like GTPase Vps1 drive endosomal recycling
Source: eLife. 2021 Sep 15;10:e69883. doi: 10.7554/eLife.69883 (PMC8504969; doi:10.7554/eLife.69883)
Supplement: Figure 1—source data 1. [file elife-69883-fig1-data1.xlsx]

## Sheet: Sheet1
Figure 1F
%cells with vacuole localized Vps55-GFP
	WT	vps35D	snx4D	mvp1D
Sample 1	0	0	8.16327	97.561
Sample 2	0	6.25	9.67742	100
Sample 3	0	0	0	95.3488
