# Supplementary material for: A PX-BAR protein Mvp1/SNX8 and a dynamin-like GTPase Vps1 drive endosomal recycling
Source: eLife. 2021 Sep 15;10:e69883. doi: 10.7554/eLife.69883 (PMC8504969; doi:10.7554/eLife.69883)
Supplement: Figure 2—figure supplement 1—source data 1. [file elife-69883-fig2-figsupp1-data1.xlsx]

## Sheet: Sheet1
Figure 2-figure supplement 1D
Normalized intensity
	0sec		2sec		4sec
	mCh- Vps21	Vps55 -mNG	mCh- Vps21	Vps55 -mNG	mCh- Vps21	Vps55 -mNG
0	0.0432331	0.0861155	0.078108	0.114726	0.0547623	0.107171
1	0.0404707	0.0757375	0.0621694	0.102305	0.0651069	0.0982264
2	0.0433835	0.0753983	0.06004	0.0918454	0.0839689	0.0878203
3	0.0317669	0.0726462	0.0631721	0.0846266	0.108307	0.0770185
4	0.0300752	0.0708126	0.0788825	0.0911375	0.0957318	0.0930026
5	0.0300752	0.0706589	0.0800533	0.105232	0.0740313	0.139263
6	0.0364286	0.0861597	0.0790526	0.121828	0.0547623	0.241832
7	0.0521308	0.100615	0.0641547	0.170336	0.0547623	0.407937
8	0.0721865	0.11496	0.0661521	0.256346	0.0706233	0.519436
9	0.106767	0.10908	0.0848905	0.381133	0.102831	0.540725
10	0.119048	0.0883236	0.0978892	0.488832	0.123045	0.465217
11	0.111466	0.0779456	0.0937564	0.44011	0.110295	0.390007
12	0.0875368	0.0675676	0.0897258	0.336178	0.0930959	0.358328
13	0.0696737	0.0621286	0.0800533	0.245112	0.0735294	0.354953
14	0.0530947	0.0727645	0.0800533	0.217535	0.0723666	0.329191
15	0.0451128	0.0717629	0.0756744	0.225308	0.0841715	0.274891
16	0.0328316	0.0919378	0.0603782	0.254497	0.109985	0.201434
17	0.0300752	0.10944	0.0681014	0.275301	0.139381	0.133062
18	0.0300752	0.127186	0.0729426	0.308176	0.180838	0.118288
19	0.0395609	0.155082	0.128742	0.387549	0.273636	0.174025
20	0.0762842	0.210873	0.224223	0.503529	0.403618	0.336046
21	0.161316	0.345941	0.409156	0.675726	0.599708	0.636053
22	0.407845	0.57902	0.73046	0.898393	0.866367	0.950746
23	0.726027	0.842152	0.946556	1	1	1
24	0.991015	1	1	0.946513	0.898629	0.761487
25	1	0.921878	0.898422	0.727791	0.651064	0.445438
26	0.846917	0.672673	0.704717	0.453035	0.35916	0.230279
27	0.518985	0.415607	0.51605	0.244044	0.22124	0.135363
28	0.284567	0.270219	0.353027	0.13287	0.179201	0.09616
29	0.150802	0.193796	0.229315	0.0981524	0.180716	0.0869484
30	0.0986842	0.162295	0.172753	0.0922798	0.17747	0.0944565
