# Supplementary material for: A PX-BAR protein Mvp1/SNX8 and a dynamin-like GTPase Vps1 drive endosomal recycling
Source: eLife. 2021 Sep 15;10:e69883. doi: 10.7554/eLife.69883 (PMC8504969; doi:10.7554/eLife.69883)
Supplement: Figure 2—source data 1. [file elife-69883-fig2-data1.xlsx]

## Sheet: Sheet1
Figure 2E
%cells with vacuole localized Vps55-GFP
	vec	WT	R172E	I346E/ Q468E/ W496E
Sample 1	100	3.0303	93.9394	100
Sample 2	95.2381	3.125	94.5946	93.9394
Sample 3	100	2.63158	95	94.2857
