# Supplementary material for: A PX-BAR protein Mvp1/SNX8 and a dynamin-like GTPase Vps1 drive endosomal recycling
Source: eLife. 2021 Sep 15;10:e69883. doi: 10.7554/eLife.69883 (PMC8504969; doi:10.7554/eLife.69883)
Supplement: Figure 3—figure supplement 1—source data 3. [file elife-69883-fig3-figsupp1-data3.xlsx]

## Sheet: Sheet1
Figure 3-figure supplement 1F
%cells with vacuole membrane localized Vps55-GFP
	WT, vec	WT, VPS68 OE	VPS55-GFP OE, vec	VPS55-GFP OE, VPS68 OE
Sample 1	0	0	3.125	24.3902
Sample 2	0	0	0	47.6191
Sample 3	0	2.85714	0	41.6667
