# Supplementary material for: A PX-BAR protein Mvp1/SNX8 and a dynamin-like GTPase Vps1 drive endosomal recycling
Source: eLife. 2021 Sep 15;10:e69883. doi: 10.7554/eLife.69883 (PMC8504969; doi:10.7554/eLife.69883)
Supplement: Figure 3—source data 1. [file elife-69883-fig3-data1.xlsx]

## Sheet: Sheet1
Figure 3A
%cells with vacuole localized Vps55-GFP
	60-63A	64-67A	68-71A	72-75A	133-136A	137-140A
Sample 1	96.1538	80	34.6154	3.92157	5.33333	6.25
Sample 2	88.8889	84.4444	25	6.66667	11.1111	8.77193
Sample 3	88	98.6111	30.3571	21.875	4.28571	8.23529
