# Supplementary material for: A PX-BAR protein Mvp1/SNX8 and a dynamin-like GTPase Vps1 drive endosomal recycling
Source: eLife. 2021 Sep 15;10:e69883. doi: 10.7554/eLife.69883 (PMC8504969; doi:10.7554/eLife.69883)
Supplement: Figure 3—source data 2. [file elife-69883-fig3-data2.xlsx]

## Sheet: Sheet1
Figure 3B
%cells with vacuole localized Vps55-GFP
	K60A	Y61A	H62A	T63A	S64D	D65A	F66A	M67A
Sample 1	59.322	77.5281	6.77966	80.3571	4.7619	59.4595	80	77.5862
Sample 2	64.1026	74.6835	3.27869	66.6667	2.08333	59.5238	76.087	72.9167
Sample 3	50.8197	80	7.14286	63.7681	5.76923	49.1228	73.2143	83.3333
