# Supplementary material for: A PX-BAR protein Mvp1/SNX8 and a dynamin-like GTPase Vps1 drive endosomal recycling
Source: eLife. 2021 Sep 15;10:e69883. doi: 10.7554/eLife.69883 (PMC8504969; doi:10.7554/eLife.69883)
Supplement: Figure 3—source data 3. [file elife-69883-fig3-data3.xlsx]

## Sheet: Sheet1
Figure 3D
%cells with vacuole localized Vps55-GFP
	WT	Y61A/T63A	F66A/M67A	Y61A/T63A /F66A/M67A
Sample 1	0	71.4286	70	98.6111
Sample 2	0	64	70.5882	96.4286
Sample 3	0	74.1935	60.8696	100
