# Supplementary material for: A PX-BAR protein Mvp1/SNX8 and a dynamin-like GTPase Vps1 drive endosomal recycling
Source: eLife. 2021 Sep 15;10:e69883. doi: 10.7554/eLife.69883 (PMC8504969; doi:10.7554/eLife.69883)
Supplement: Figure 4—figure supplement 1—source data 1. [file elife-69883-fig4-figsupp1-data1.xlsx]

## Sheet: Sheet1
Figure 4-figure supplement 1I
%cells with vacuole localized Vps55-GFP
	WT	vps34D
Sample 1	9.09091	97.1429
Sample 2	0	100
Sample 3	6.66667	93.3333
