# Supplementary material for: A PX-BAR protein Mvp1/SNX8 and a dynamin-like GTPase Vps1 drive endosomal recycling
Source: eLife. 2021 Sep 15;10:e69883. doi: 10.7554/eLife.69883 (PMC8504969; doi:10.7554/eLife.69883)
Supplement: Figure 4—figure supplement 1—source data 2. [file elife-69883-fig4-figsupp1-data2.xlsx]

## Sheet: Sheet1
Figure 4-figure supplement 1L
%cells with Vps1-GFP localizing to the cytosol
	WT/WT	WT/R172E	vps1D/WT	vps1D/R172E
Sample 1	0	100	0	100
Sample 2	0	100	0	100
Sample 3	0	100	0	100
