# Supplementary material for: A PX-BAR protein Mvp1/SNX8 and a dynamin-like GTPase Vps1 drive endosomal recycling
Source: eLife. 2021 Sep 15;10:e69883. doi: 10.7554/eLife.69883 (PMC8504969; doi:10.7554/eLife.69883)
Supplement: Figure 4—source data 2. [file elife-69883-fig4-data2.xlsx]

## Sheet: Sheet1
Figure 4H
%cells with vacuole localized Vps55-GFP
	K42A
Sample 1	97.3684
Sample 2	96.6667
Sample 3	100
