# Supplementary material for: A PX-BAR protein Mvp1/SNX8 and a dynamin-like GTPase Vps1 drive endosomal recycling
Source: eLife. 2021 Sep 15;10:e69883. doi: 10.7554/eLife.69883 (PMC8504969; doi:10.7554/eLife.69883)
Supplement: Figure 4—source data 3. [file elife-69883-fig4-data3.xlsx]

## Sheet: Sheet1
Figure 4K
%cells with Vps1-GFP localizing to the cytosol
	WT	vps35D	snx4D	mvp1D	vps35D mvp1D snx4D
Sample 1	2.5641	0	5.55556	3.33333	93.3333
Sample 2	6.66667	0	0	7.89474	97.1429
Sample 3	5.71429	5.55556	3.7037	4	87.5
