# Supplementary material for: A PX-BAR protein Mvp1/SNX8 and a dynamin-like GTPase Vps1 drive endosomal recycling
Source: eLife. 2021 Sep 15;10:e69883. doi: 10.7554/eLife.69883 (PMC8504969; doi:10.7554/eLife.69883)
Supplement: Figure 5—source data 1. [file elife-69883-fig5-data1.xlsx]

## Sheet: Sheet1
Figure 5B
%cells with vacuole localized Vps10-GFP
	WT	vps35D	mvp1D
Sample 1	0	100	3.84615
Sample 2	0	100	2.7027
Sample 3	0	100	0
%cells with vacuole localized Kex2-GFP
	WT	vps35D	mvp1D
Sample 1	0	96.7742	0
Sample 2	0	94.5946	0
Sample 3	0	96.4912	0
%cells with vacuole localized GFP-Neo1
	WT	vps35D	mvp1D
Sample 1	0	100	0
Sample 2	0	100	0
Sample 3	0	98.1481	0
