# Supplementary material for: A PX-BAR protein Mvp1/SNX8 and a dynamin-like GTPase Vps1 drive endosomal recycling
Source: eLife. 2021 Sep 15;10:e69883. doi: 10.7554/eLife.69883 (PMC8504969; doi:10.7554/eLife.69883)
Supplement: Figure 5—source data 3. [file elife-69883-fig5-data3.xlsx]

## Sheet: Sheet1
Figure 5E
Isolated vesicle size (nm)
Sample 1	36.6
Sample 2	41.5
Sample 3	48.7
Sample 4	37.9
Sample 5	40.1
Sample 6	38.2
Sample 7	52.9
Sample 8	35.6
Sample 9	42.2
Sample 10	50.4
Sample 11	31.6
Sample 12	68.7
Sample 13	59.6
Sample 14	48.8
Sample 15	70.9
Sample 16	74.8
Sample 17	51.1
Sample 18	43
Sample 19	83.2
Sample 20	65.4
Sample 21	74.8
Sample 22	72
Sample 23	52.6
Sample 24	74.8
Sample 25	65.1
