# Supplementary material for: A PX-BAR protein Mvp1/SNX8 and a dynamin-like GTPase Vps1 drive endosomal recycling
Source: eLife. 2021 Sep 15;10:e69883. doi: 10.7554/eLife.69883 (PMC8504969; doi:10.7554/eLife.69883)
Supplement: Figure 5—source data 4. [file elife-69883-fig5-data4.xlsx]

## Sheet: Sheet1
Figure 5J
%cells with vacuole localized Nhx1-GFP
	wt	vps35D	snx4D	mvp1D	vps35D snx4D	vps35D mvp1D	mvp1D snx4D	vps35D mvp1D snx4D
Sample 1	0	0	0	0	20	18.1818	0	96.6667
Sample 2	0	0	0	0	33.3333	8.77193	0	80
Sample 3	0	9.09091	0	0	26.6667	14.0351	0	96.6667
