# Supplementary material for: A PX-BAR protein Mvp1/SNX8 and a dynamin-like GTPase Vps1 drive endosomal recycling
Source: eLife. 2021 Sep 15;10:e69883. doi: 10.7554/eLife.69883 (PMC8504969; doi:10.7554/eLife.69883)
Supplement: Figure 6—figure supplement 1—source data 2. [file elife-69883-fig6-figsupp1-data2.xlsx]

## Sheet: Sheet1
Figure 6-figure supplement1E
%cell dye positive
		Sample1	Sample2	Sample3
1	WT at 26C	0	0	0
2	ddd at 26C	0.0272727	0.0273224	0.0117188
3	WT at 40C for 2 hrs	0.008	0.00826446	0.0118577
4	ddd at 40C for 2 hrs	0.862944	0.901639	0.913242
