# Supplementary material for: A PX-BAR protein Mvp1/SNX8 and a dynamin-like GTPase Vps1 drive endosomal recycling
Source: eLife. 2021 Sep 15;10:e69883. doi: 10.7554/eLife.69883 (PMC8504969; doi:10.7554/eLife.69883)
Supplement: Figure 6—source data 2. [file elife-69883-fig6-data2.xlsx]

## Sheet: Sheet1
Figure 6I
%Growth related to WT
		Sample 1	Sample 2	Sample 3
1	WT, mock	108.658	96.9506	94.3897
2	vps35D, mock	101.707	99.3287	94.0238
3	snx4D, mock	99.5116	99.3287	90.3653
4	mvp1D, mock	102.621	102.255	95.1214
5	vps35Dsnx4D, mock	99.6945	96.4019	91.2799
6	vps35Dmvp1D, mock	96.4019	86.3409	88.536
7	mvp1Dsnx4D, mock	98.414	94.7555	94.2067
8	vps35Dmvp1Dsnx4D, mock	88.9019	79.2068	79.2068
9	WT, +Duramycin	61.0972	64.7557	66.0362
10	vps35D, +Duramycin	65.4874	47.5607	49.9387
11	snx4D, +Duramycin	81.5849	85.6092	80.8532
12	mvp1D, +Duramycin	91.8287	83.0483	81.219
13	vps35Dsnx4D, +Duramycin	3.58534	1.28048	3.31096
14	vps35Dmvp1D, +Duramycin	6.1463	4.99387	3.76827
15	mvp1Dsnx4D, +Duramycin	47.3778	39.512	39.329
16	vps35Dmvp1Dsnx4D, +Duramycin	0	0	0
