# Supplementary material for: A PX-BAR protein Mvp1/SNX8 and a dynamin-like GTPase Vps1 drive endosomal recycling
Source: eLife. 2021 Sep 15;10:e69883. doi: 10.7554/eLife.69883 (PMC8504969; doi:10.7554/eLife.69883)
Supplement: Figure 7—figure supplement 1—source data 1. [file elife-69883-fig7-figsupp1-data1.xlsx]

## Sheet: Sheet1
Figure 7-figure supplement 1C
SNX8 puncta size (um)
	Lower	Higher
Sample 1	0.67	0.88
Sample 2	0.38	0.78
Sample 3	0.49	0.51
Sample 4	0.71	1.26
Sample 5	0.83	0.96
Sample 6	0.53	0.67
Sample 7	0.83	0.76
Sample 8	0.61	0.87
Sample 9	0.64	0.61
Sample 10	0.61	1.01
Sample 11	0.93	0.96
Sample 12	0.83	0.76
Sample 13	0.78	0.72
Sample 14	0.69	0.61
Sample 15	0.53	0.73
Sample 16	0.59	0.94
Sample 17	0.53	0.96
Sample 18	0.56	0.91
Sample 19	0.54	0.94
Sample 20	0.54	0.83
Sample 21	0.56	1.24
Sample 22	0.68	0.66
Sample 23	0.48	0.61
Sample 24	0.43	0.68
Sample 25	0.51	0.83
Sample 26	0.42	1.47
Sample 27	0.59	1.07
Sample 28	0.38	0.93
Sample 29	0.51	1.25
Sample 30	0.54	1.37
Sample 31	0.6	1.37
Sample 32	0.68	1.33
Sample 33	0.49	0.94
Sample 34	0.3	0.76
Sample 35	0.45	1.1
Sample 36	0.45	0.94
Sample 37		1.11
Sample 38		0.72
Sample 39		0.96
Sample 40		0.76
Sample 41		0.38
Sample 42		1.13
Sample 43		0.93
Sample 44		0.76
