# Supplementary material for: A PX-BAR protein Mvp1/SNX8 and a dynamin-like GTPase Vps1 drive endosomal recycling
Source: eLife. 2021 Sep 15;10:e69883. doi: 10.7554/eLife.69883 (PMC8504969; doi:10.7554/eLife.69883)
Supplement: Figure 7—figure supplement 1—source data 2. [file elife-69883-fig7-figsupp1-data2.xlsx]

## Sheet: Sheet1
Figure 7-figure supplement 1D
Max length of SNX8 tubule (um)
	Lower	Higher
Sample 1	0.72	4.64
Sample 2	0.72	2.28
Sample 3	0.72	2.03
Sample 4	0.6	4.42
Sample 5	0.49	4.46
Sample 6	0.6	3.11
Sample 7	0.56	3.49
Sample 8	1.89	2.55
Sample 9	0.76	2.72
Sample 10	1.01	5
