# Supplementary material for: A PX-BAR protein Mvp1/SNX8 and a dynamin-like GTPase Vps1 drive endosomal recycling
Source: eLife journal article supplement (doi:10.7554/elife.69883), 2021-09-15
Supplement: figures [file elife-69883-figures-v2.pdf]

---

## Figures and figure supplements

A PX-BAR protein Mvp1/SNX8 and a dynamin-like GTPase Vps1 drive endosomal recycling

**Sho W Suzuki et al**

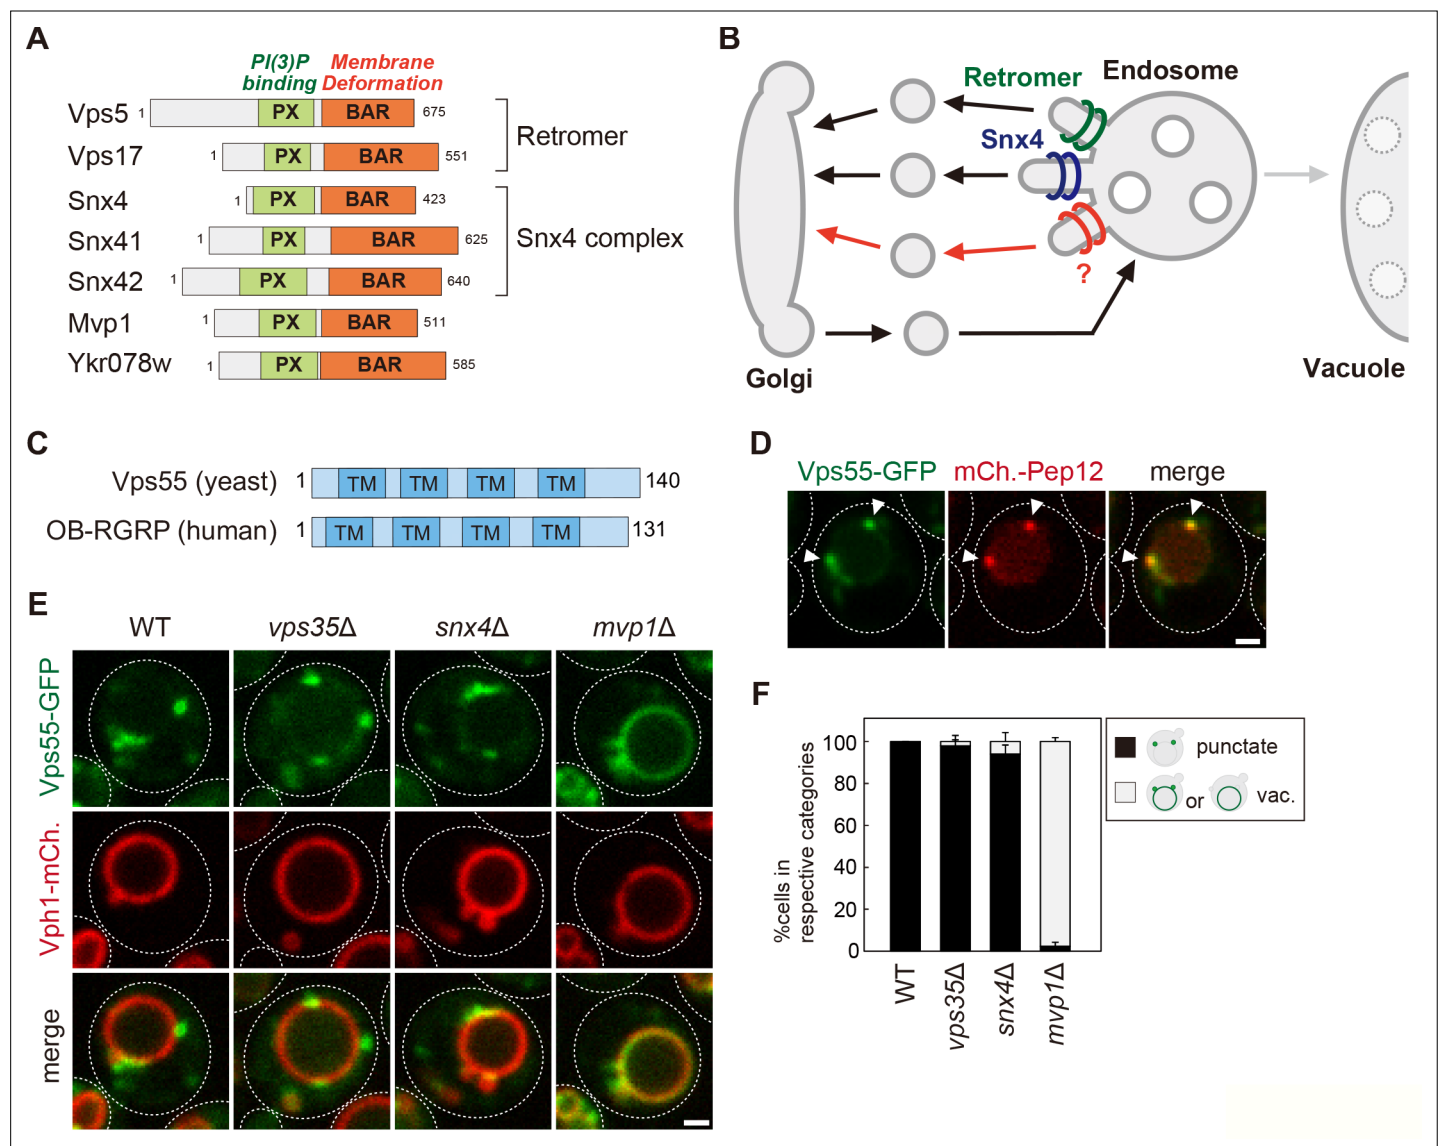

**Figure 1.** The endosomal localization of Vps55 requires Mvp1. **(A)** Schematic of SNX-BAR proteins in yeast. **(B)** Model of endosomal recycling pathways in yeast. **(C)** Schematic of Vps55 and OB-RGRP. **(D)** Vps55-GFP localization. The mCherry-Pep12 serves as an endosomal marker. **(E)** Vps55-GFP localization in wild-type (WT), *vps35Δ* (retromer mutant), *snx4Δ* (Snx4 complex mutant), and *mvp1Δ*. **(F)** Quantification of Vps55-GFP localization from three independent experiments. N = >30 cells. Scale bar: 1  $\mu$ m.

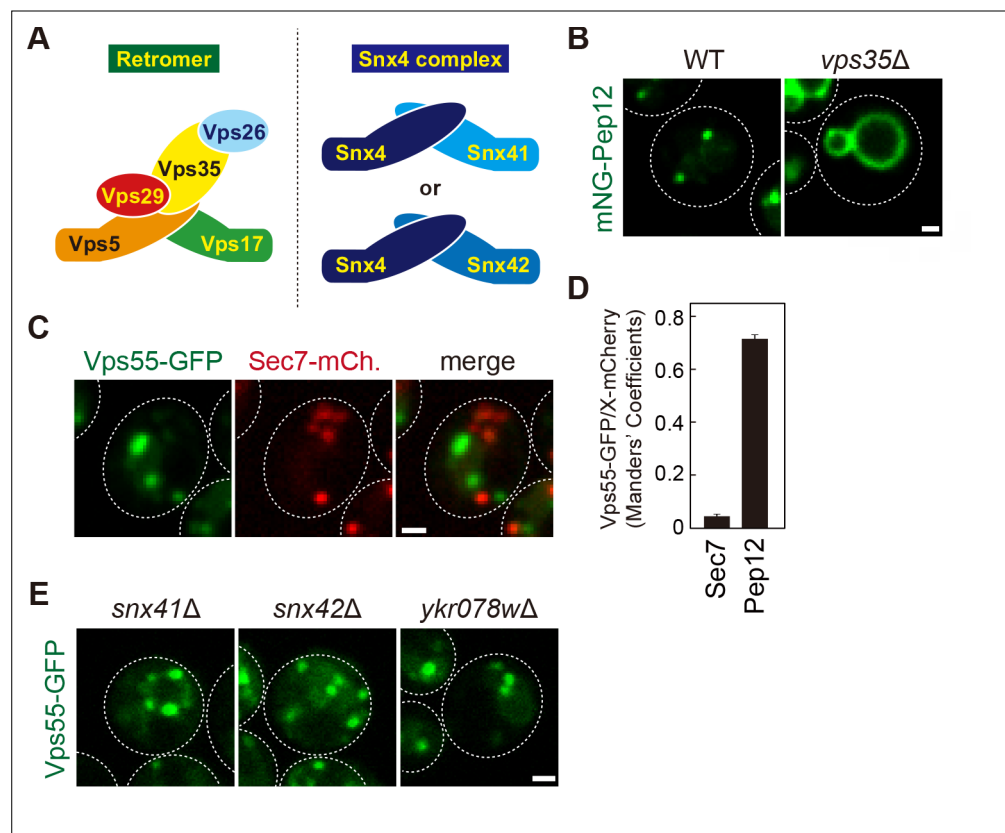

**Figure 1—figure supplement 1.** The localization of endosomal membrane proteins. **(A)** Schematic of retromer and Snx4 complexes. **(B)** The localization of mNeonGreen-Pep12 in wild-type (WT) and *vps35Δ* cells. **(C)** Vps55-GFP localization with Sec7-mCherry serving as a marker for the trans-Golgi. **(D)** Manders' coefficients of Vps55-GFP with Sec7-mCherry or mCherry-Pep12 from **C** and **Figure 1D**. **(E)** Vps55-GFP localization in *snx41Δ*, *snx42Δ*, and *ykr078wΔ* cells. Scale bar: 1  $\mu$ m.

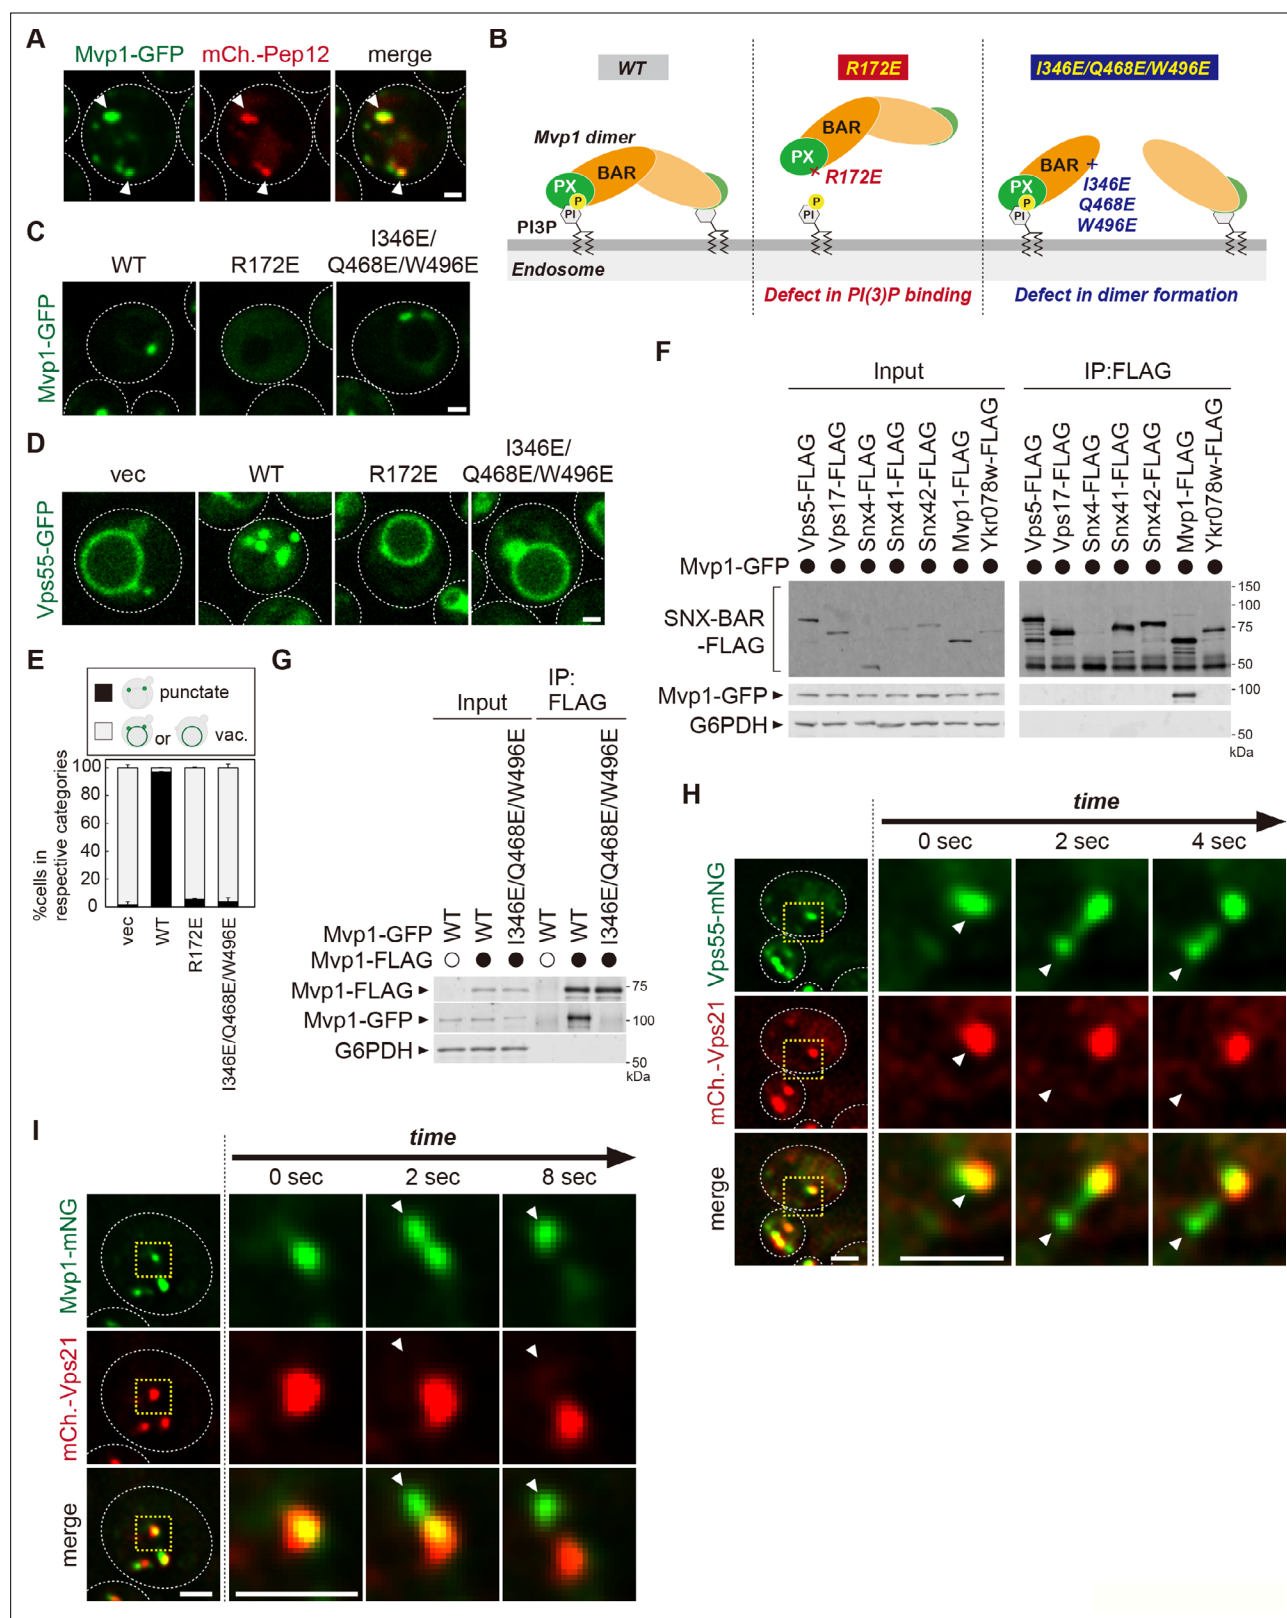

**Figure 2.** Mvp1 is an endosomal coat complex for Vps55 recycling. **(A)** Mvp1-GFP localization. The mCherry-Pep12 serves as an endosomal marker. **(B)** Schematic of Mvp1 mutants. **(C)** The localization of Mvp1-GFP mutants. **(D)** The localization of Vps55-GFP mutants. **(E)** Quantitation of Vps55-GFP localization of *mvp1* mutants from three independent experiments.  $N = >30$  cells. **(F)** The binding of SNX-BAR proteins with Mvp1. FLAG-tagged SNX-BAR proteins were immunoprecipitated (IP) from cells expressing Mvp1-GFP, and the IP products were analyzed by immunoblotting using antibodies

Figure 2 continued on next page



*Figure 2 continued*

against FLAG, green fluorescent protein (GFP), and glucose-6-phosphate dehydrogenase (G6PDH). **(G)** The dimer formation of *mvp1* mutants. Mvp1-FLAG was immunoprecipitated from cells expressing Mvp1-GFP mutants, and the IP products were analyzed by immunoblotting using antibodies against FLAG, GFP, and G6PDH. **(H)** Live-cell imaging analysis of Vps55-mNeonGreen and mCherry-Vps21. **(I)** Live-cell imaging analysis of Mvp1-mNeonGreen and mCherry-Vps21. Scale bar: 1  $\mu$ m.

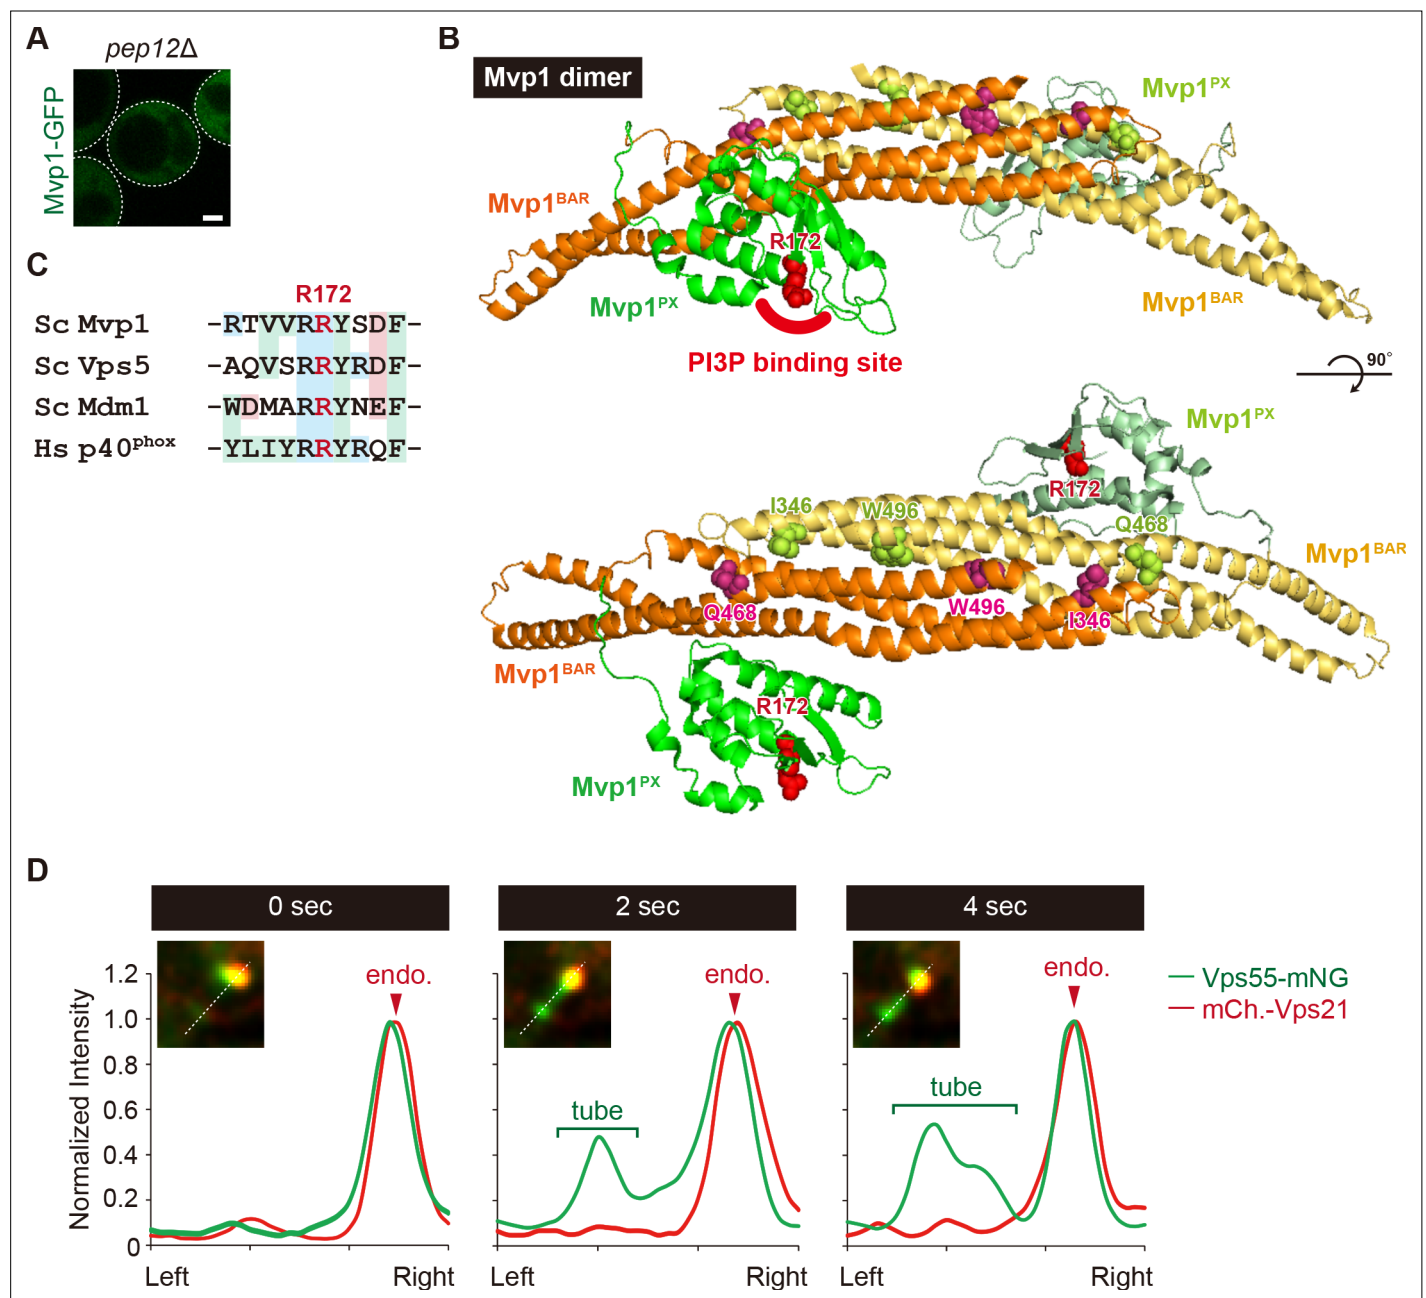

**Figure 2—figure supplement 1.** The analysis of Mvp1. (A) Mvp1-GFP localization in *pep12Δ* cells. Scale bar: 1  $\mu$ m. (B) Mutation sites used in this study are shown on the cryo-electron microscopy (cryo-EM) structure of *Saccharomyces cerevisiae* Mvp1 (PDB ID code: 6Q0X). (C) Sequence comparison of the residue required for phosphatidylinositol 3-phosphate (PI3P) binding among Phox homology (PX) domain-containing proteins. (D) Line scan analysis performed for the region highlighted by the white line from **Figure 2H**.

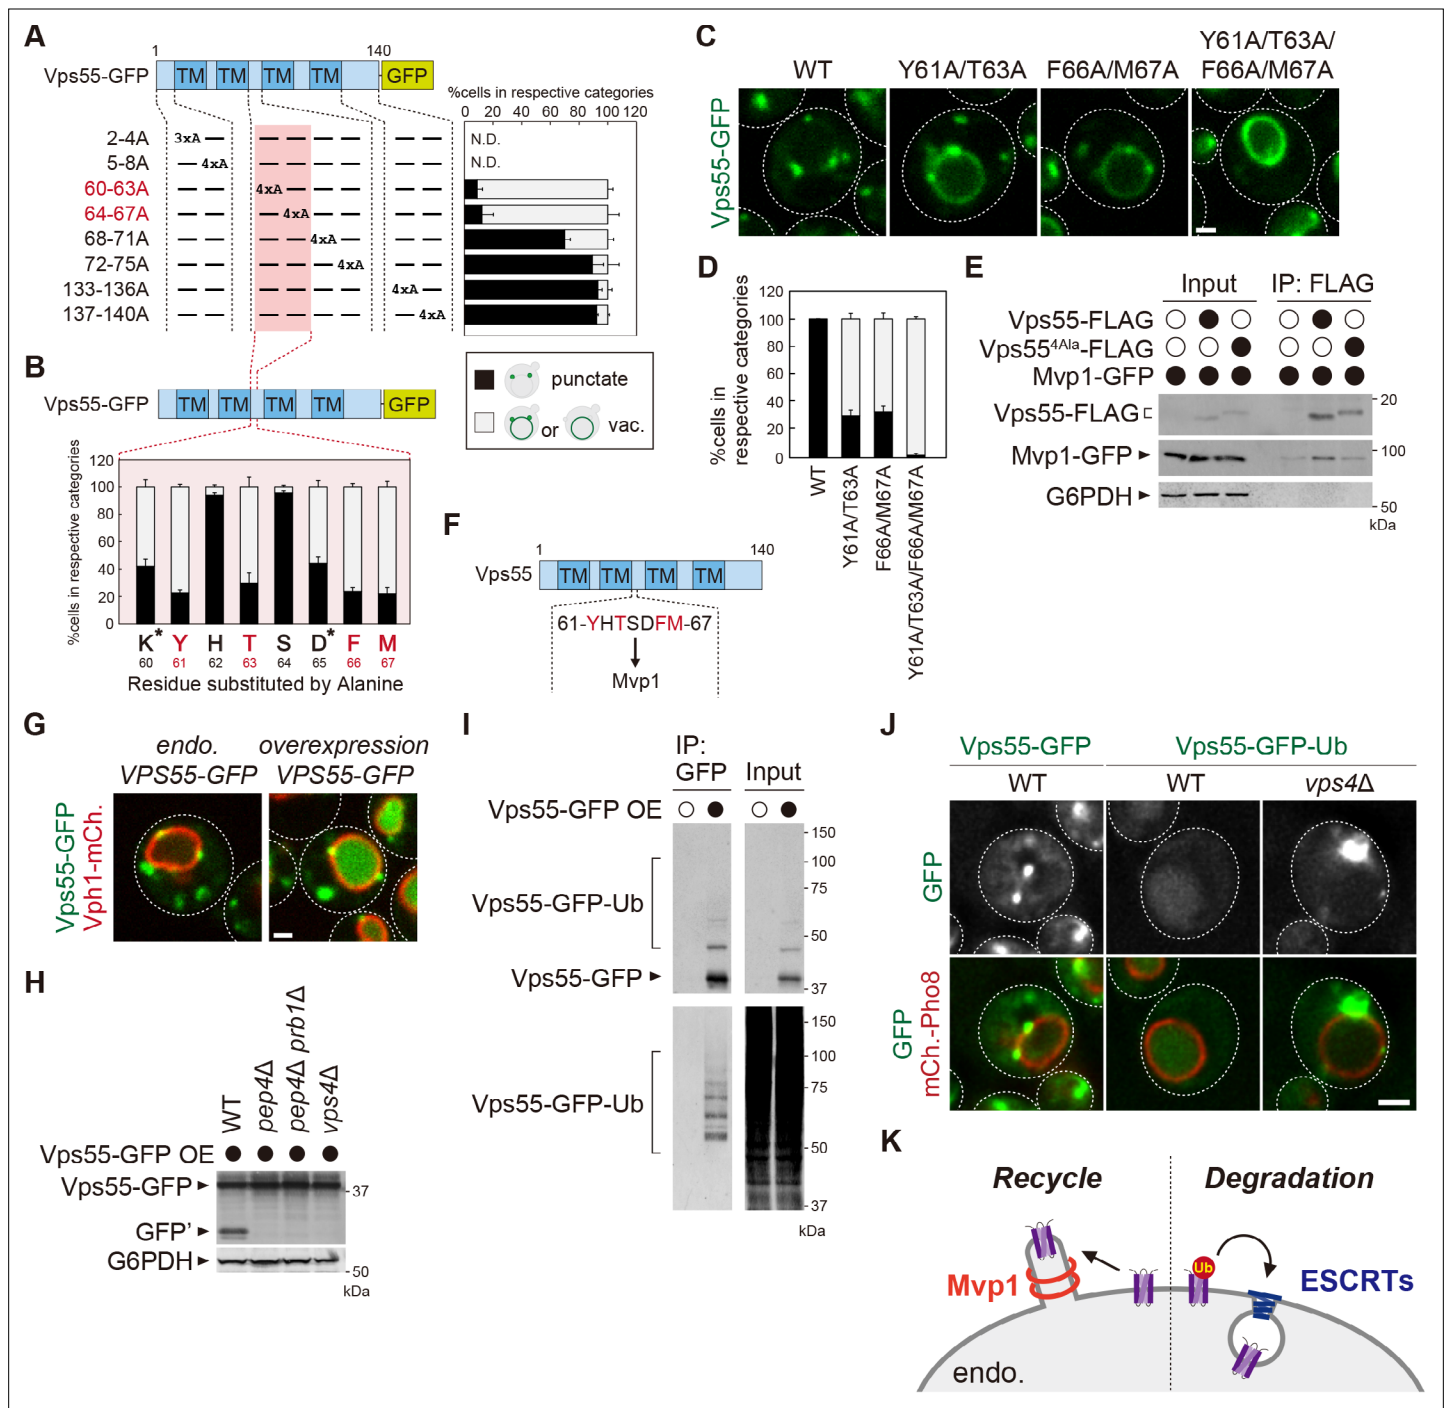

**Figure 3.** Mvp1 recognizes Vps55 through a specific sorting motif. (A, B, and D) Schematic of Vps55 mutational analysis and quantitation of Vps55-GFP mutant localization, from **Figure 3—figure supplement 1A** (A), **Figure 3—figure supplement 1B** (B), and **Figure 3—figure supplement 1C** (D). (C) The localization of Vps55-GFP mutants. (E) The Mvp1-Vps55 interaction in Vps55-FLAG mutants. Vps55-FLAG mutants were immunoprecipitated (IP) from cells expressing Mvp1-GFP, and the IP products were analyzed by immunoblotting using antibodies against FLAG, green fluorescent protein (GFP), and glucose-6-phosphate dehydrogenase (G6PDH). (F) Schematic of Vps55 and the residues facilitating its interaction with Mvp1. (G) The localization of overexpressed Vps55-GFP. (H) Vps55-GFP sorting in vacuolar hydrolases (*pep4Δ* and *pep4Δ prb1Δ*) and ESCRT (*vps4Δ*) mutants. Cell lysates expressing Vps55-GFP were analyzed by immunoblotting using antibodies against GFP and G6PDH. (I) The ubiquitination of overexpressed Vps55-GFP. Overexpressed Vps55-GFP was immunoprecipitated from yeast cells under denaturing conditions, and the IP products were analyzed by immunoblotting using antibodies against GFP and ubiquitin. (J) Vps55-GFP-Ub localization in ESCRT mutants. (K) Model of Vps55 recycling and degradation at the endosome. For all quantification shown in this figure,  $n = >30$  cells from three independent experiments. Scale bar: 1  $\mu$ m.

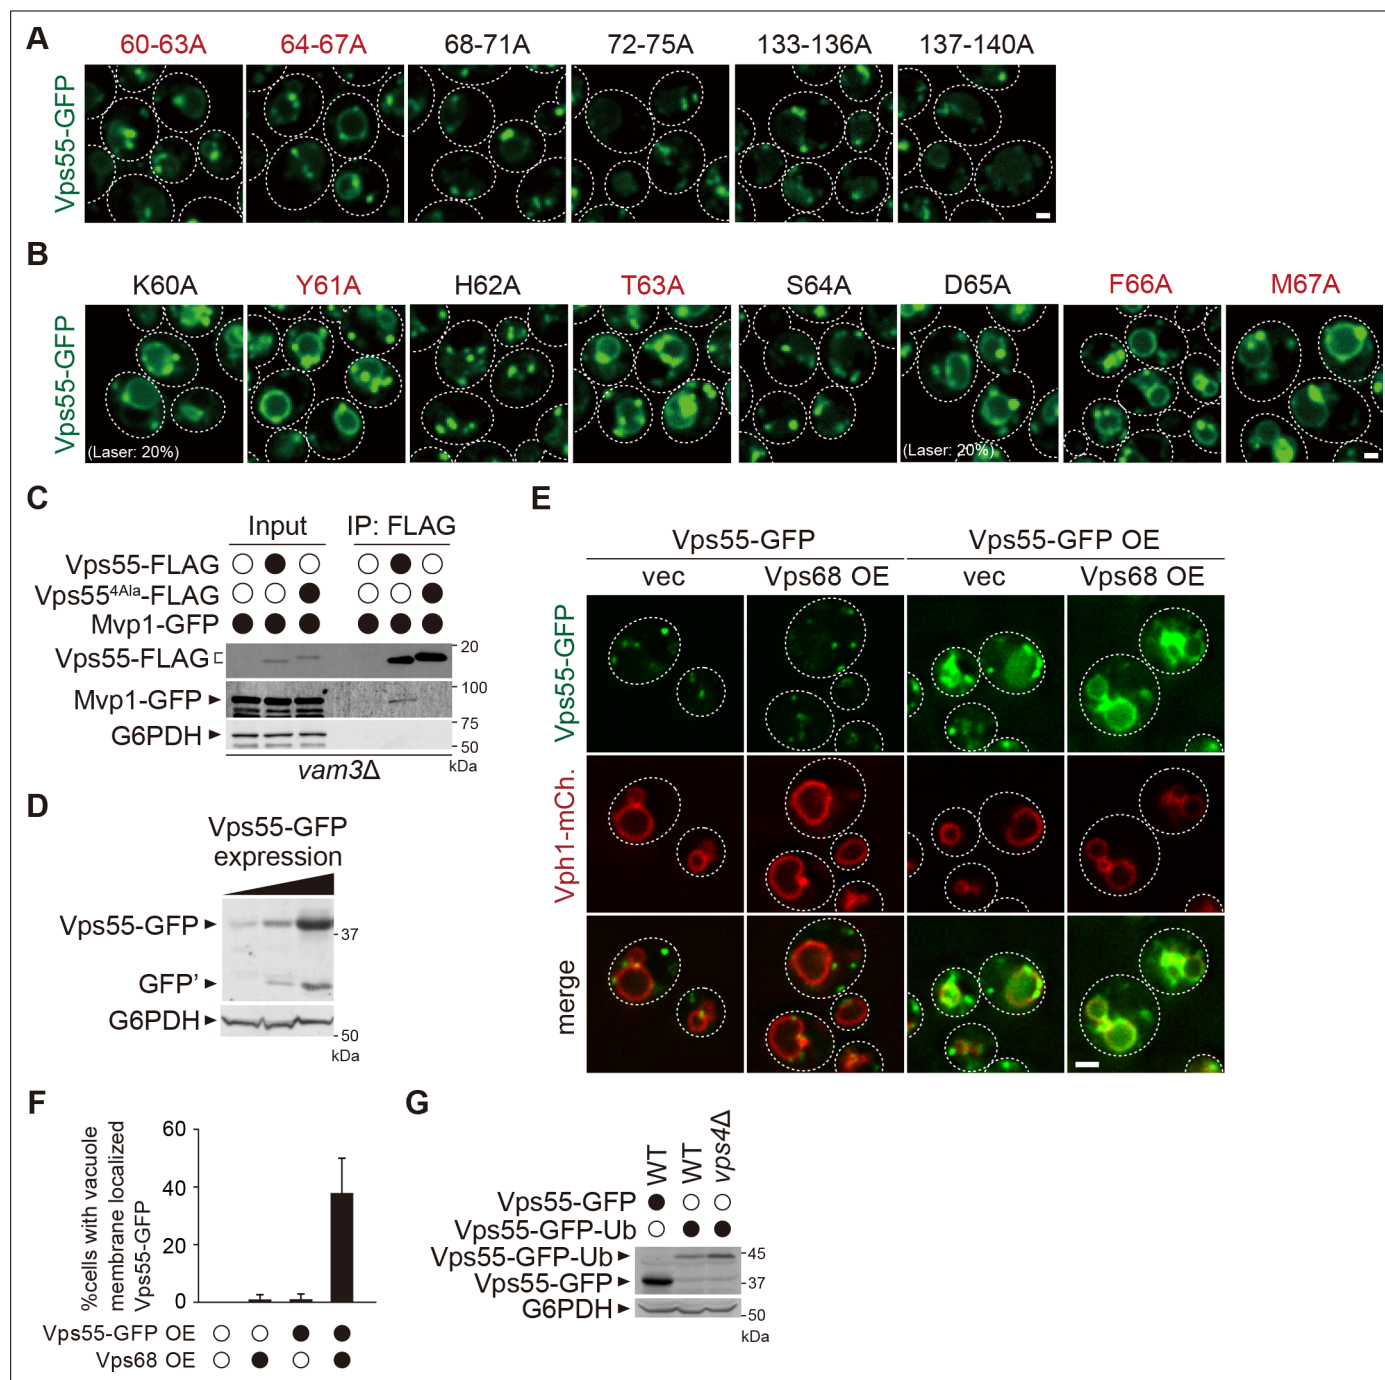

**Figure 3—figure supplement 1.** The analysis of Vps55. **(A and B)** Localization of Vps55-GFP mutants. In K60A and D65A mutants, the excitation laser intensity was lowered to 20%, because its expression was higher than other mutants. **(C)** The Mvp1-Vps55 interaction in *vam3Δ* cells. Vps55-FLAG mutants were immunoprecipitated (IP) from *vam3Δ* cells expressing Mvp1-GFP, and the IP products were analyzed by immunoblotting using antibodies against FLAG, green fluorescent protein (GFP), and glucose-6-phosphate dehydrogenase (G6PDH). **(D)** Immunoblotting of cells expressing increasing amounts of Vps55-GFP. **(E)** The localization of overexpressed Vps55-GFP and Vps68. **(F)** Quantification of Vps55-GFP localization from three independent experiments. N = >30 cells. **(G)** Cell lysates expressing Vps55-GFP or Vps55-GFP-Ub were analyzed by immunoblotting using antibodies against GFP and G6PDH. Scale bar: 1  $\mu$ m.

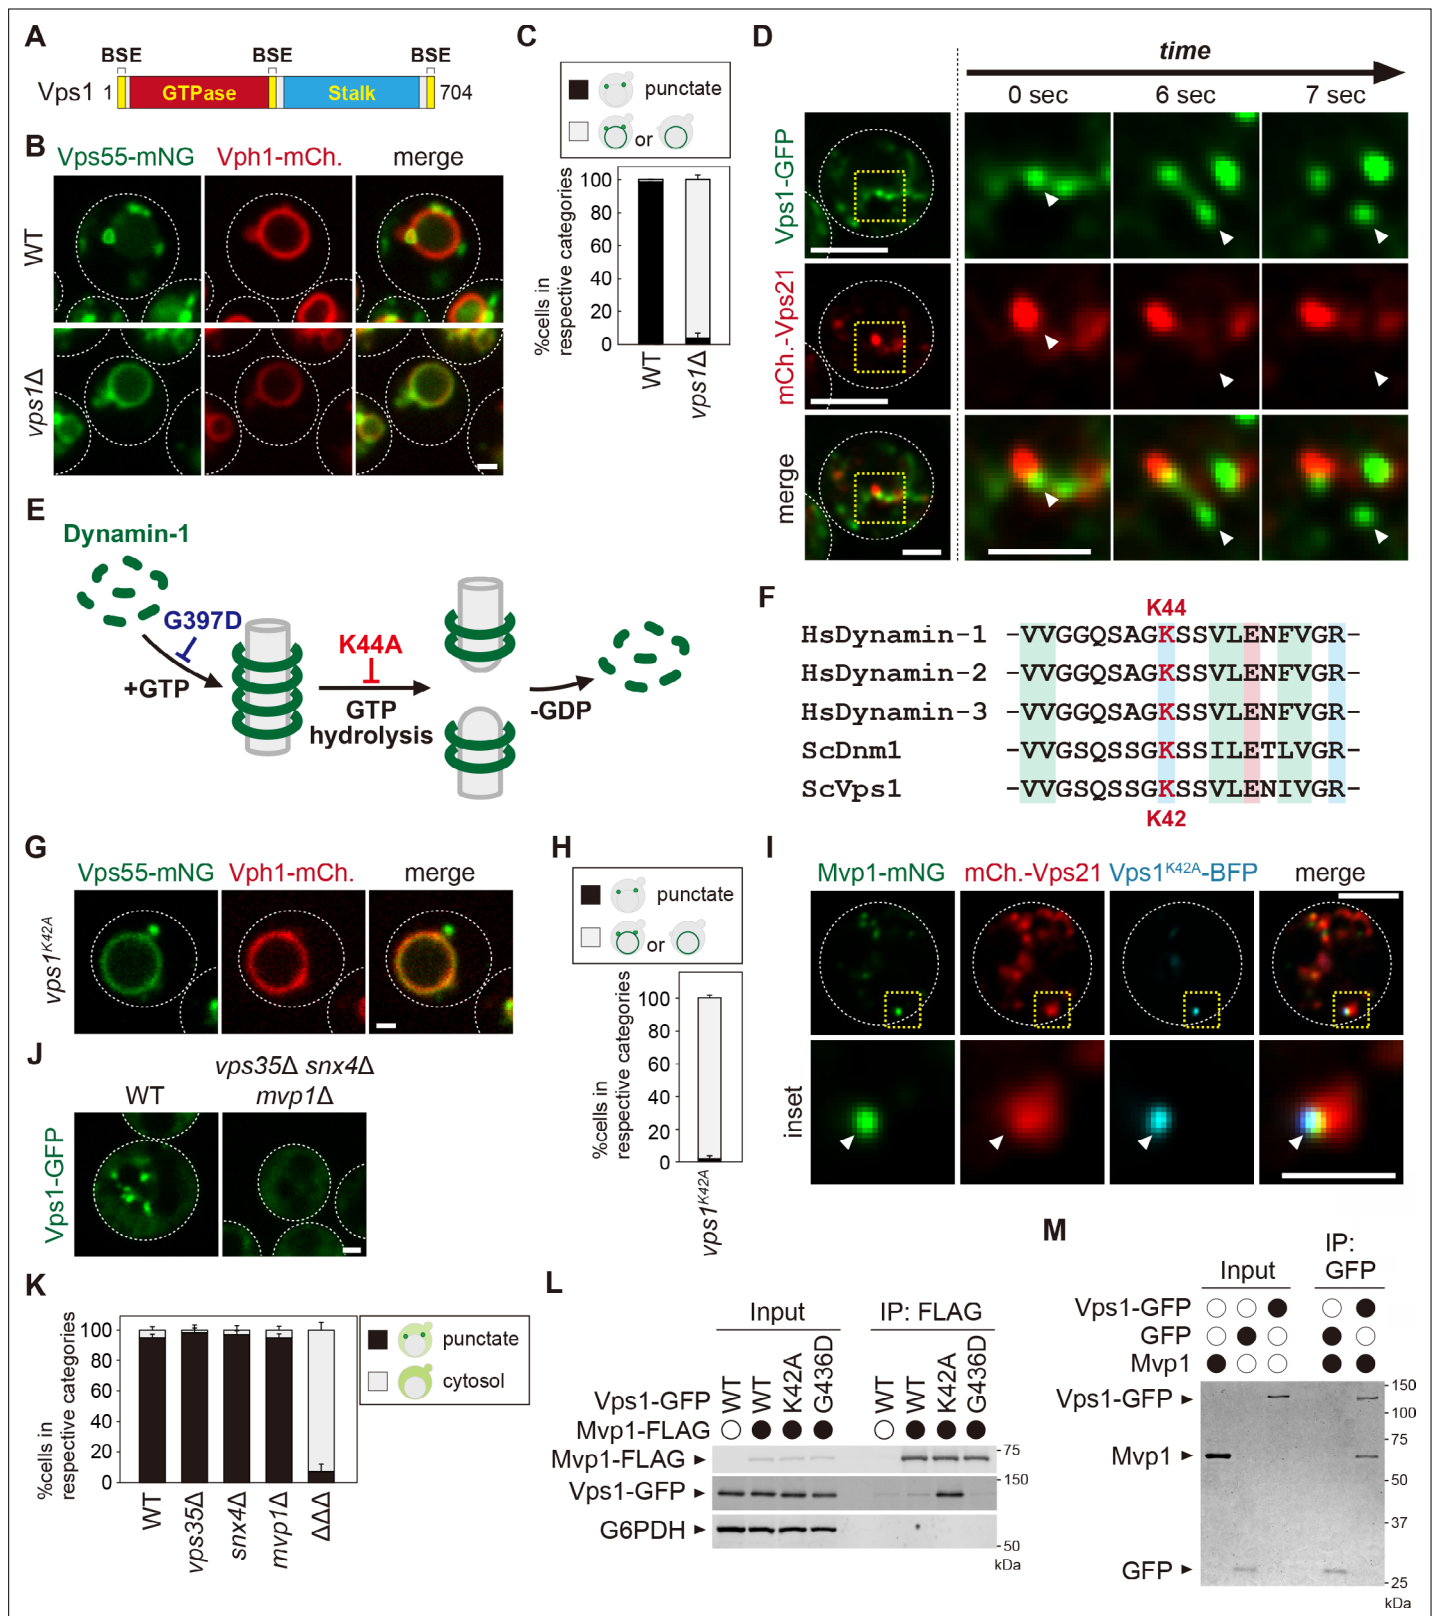

**Figure 4.** Mvp1 recruits dynamin-like GTPase Vps1 to catalyze membrane scission. **(A)** Schematic of Vps1. **(B)** Vps55-mNeonGreen localization in WT and vps1Δ cells. **(C)** Quantitation of Vps55-mNeonGreen localization, from **B**. **(D)** The live-cell imaging of Vps1-GFP. The mCherry-Vps21 serves as an endosomal marker. **(E)** Model of Dynamin-1-mediated membrane fission. **(F)** Sequence comparison of residues required for guanosine-5'-triphosphate (GTP) hydrolysis in *Homo sapiens* Dynamin-1, *H. sapiens* Dynamin-2, *H. sapiens* Dynamin-3, *Saccharomyces cerevisiae* Dnm1, and *S. cerevisiae* Vps1.

Figure 4 continued on next page

## Figure 4 continued

(G) Vps55-mNeonGreen localization in *vps1<sup>K42A</sup>* mutants. (H) Quantitation of Vps55-mNeonGreen localization, from G. (I) The localization of Mvp1-mNeonGreen, mCherry-Vps21, and Vps1<sup>K42A</sup>-BFP. (J) Vps1-GFP localization in wild-type (WT) and *vps35Δ snx4Δ mvp1Δ* triple mutants. (K) Quantitation of Vps1-GFP localization, from J and **Figure 4—figure supplement 1F**. (L) The Mvp1-Vps1 interaction. Mvp1-FLAG was immunoprecipitated (IP) from cells expressing Vps1-GFP mutants, and the IP products were analyzed using antibodies against FLAG, green fluorescent protein (GFP), and glucose-6-phosphate dehydrogenase (G6PDH). (M) In vitro binding assay between Mvp1 and Vps1-GFP. The proteins bound to anti-GFP magnetic beads were detected by Coomassie staining. For all quantifications shown in this figure, n = >30 cells from three independent experiments. Scale bar: 1 μm.



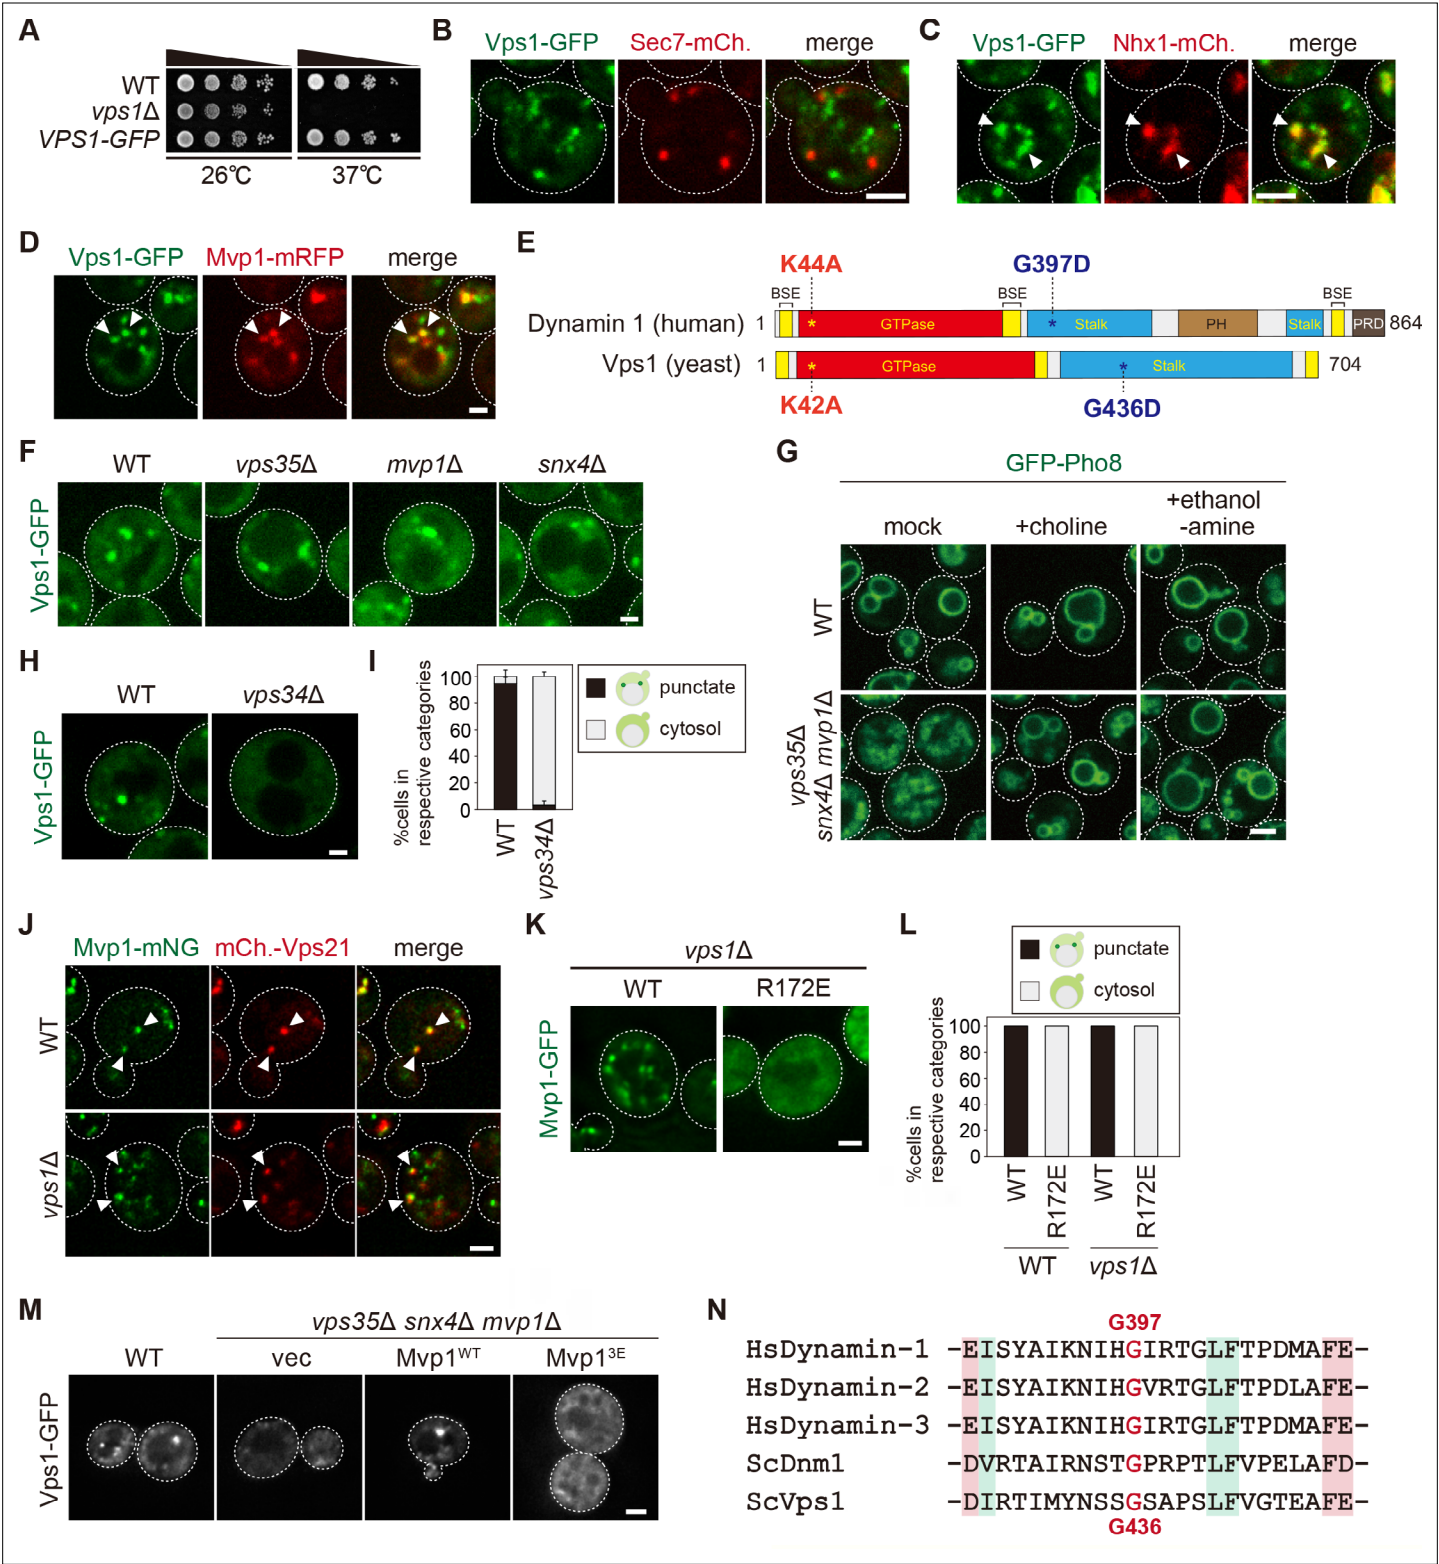

**Figure 4—figure supplement 1.** The analysis of Vps1. (A) Growth of Vps1-GFP-expressing cells. (B, C, and D) Vps1-GFP localization with Sec7-mCherry serving as a marker for the trans-Golgi (B), Nhx1-mCherry serving as a marker for the endosome (C), or Mvp1-mRFP (D). (E) Schematic of Dynamamin-1 and Vps1 domains and mutated residues. (F) Vps1-GFP localization in wild-type (WT), *vps35Δ*, *snx4Δ*, and *mvp1Δ* cells. (G) Vacuole morphology in *vps35Δ*, *snx4Δ*, and *mvp1Δ* supplemented with 2 mM choline or 2 mM ethanolamine. (H) Vps1-GFP localization in WT or *vps34Δ* cells. (I) Quantification of Vps1-GFP localization from H. (J) Mvp1-mNeonGreen localization in WT and *vps1Δ* cells with mCherry-Vps21 serving as an endosomal marker. (K) Localization of Vps1-GFP in WT and *vps1Δ* R172E cells. (L) Quantification of Vps1-GFP localization from K. (M) Vps1-GFP localization in WT, *vps35Δ*, *snx4Δ*, *mvp1Δ*, and *vps35Δ* *snx4Δ* *mvp1Δ* supplemented with 2 mM choline or 2 mM ethanolamine. (N) Sequence alignment of HsDynamamin-1, HsDynamamin-2, HsDynamamin-3, ScDnm1, and ScVps1. The conserved residues are highlighted in red. The mutated residues are highlighted in green.

Figure 4—figure supplement 1 continued on next page



Figure 4—figure supplement 1 continued

of Mvp1-GFP in *vps1Δ* cells. **(L)** Quantification of Mvp1-GFP localization from **K**. **(M)** Vps1-GFP localization in WT, *vps35Δ*, *snx4Δ*, and *mvp1Δ* cells expressing Mvp1 mutants. **(N)** Sequence comparison of residues required for the assembly of Vps1 in *Homo sapiens* Dynamin-1, *H. sapiens* Dynamin-2, *H. sapiens* Dynamin-3, *Saccharomyces cerevisiae* Dnm1, and *S. cerevisiae* Vps1. Scale bar: 1  $\mu$ m.

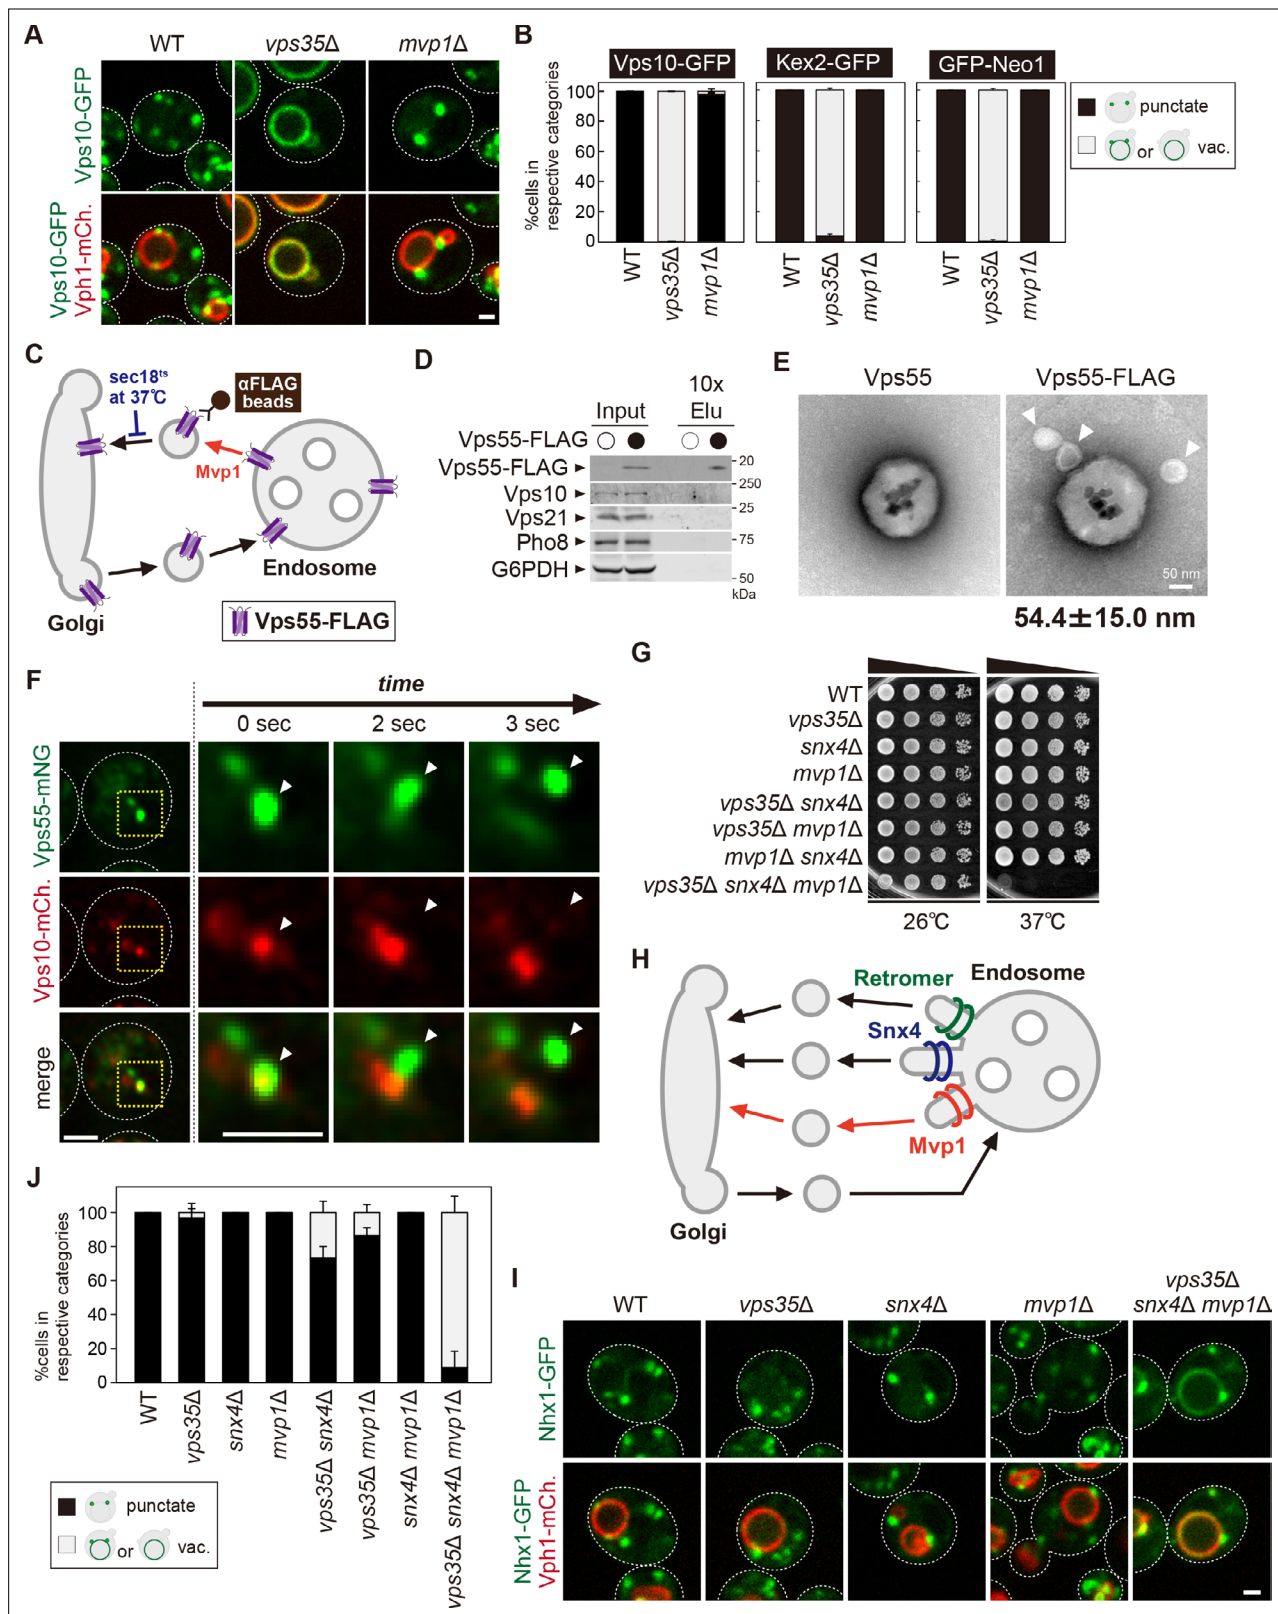

**Figure 5.** Mvp1 mainly mediates retromer-independent endosomal recycling. **(A)** Localization of Vps10-GFP in wild-type (WT), *vps35Δ*, and *mvp1Δ* cells. **(B)** Quantification of Vps10-GFP, Kex2-GFP, and GFP-Neo1 localization from **A** and **Figure 5—figure supplement 1E,F**, respectively.  $N = >30$  cells from three independent experiments. **(C)** Schematic for immunoprecipitation of Vps55-FLAG-containing structures. **(D)** The immunoprecipitation of Vps55-containing vesicles. Vps55-FLAG-containing structures were immunoprecipitated from *sec18<sup>ts</sup>* mutants incubated at 37 °C for 1 hr, and the isolated structures were

Figure 5 continued on next page

*Figure 5 continued*

analyzed by immunoblotting using antibodies against FLAG, Vps10 (retromer cargo), Vps21 (endosome), Pho8 (vacuole), and glucose-6-phosphate dehydrogenase (G6PDH) (cytoplasm). **(E)** Electron microscopy (EM) analysis of the isolated Vps55-FLAG-containing structures from **D**. **(F)** Live-cell imaging analysis of Vps55-mNeonGreen and Vps10-mCherry. **(G)** Cell growth in *vps35Δ snx4Δ mvp1Δ* triple mutants. Cells lacking Vps35 as well as Snx4 and Mvp1 were grown at 26°C and 37°C. **(H)** Model of retromer-, Snx4-, and Mvp1-mediated recycling. **(I)** Nhx1 localization in SNX-BAR mutants. **(J)** Quantitation of Nhx1-GFP localization, from **I** and **Figure 5—figure supplement 1M**. N = >30 cells from three independent experiments. Scale bar: 1 μm.

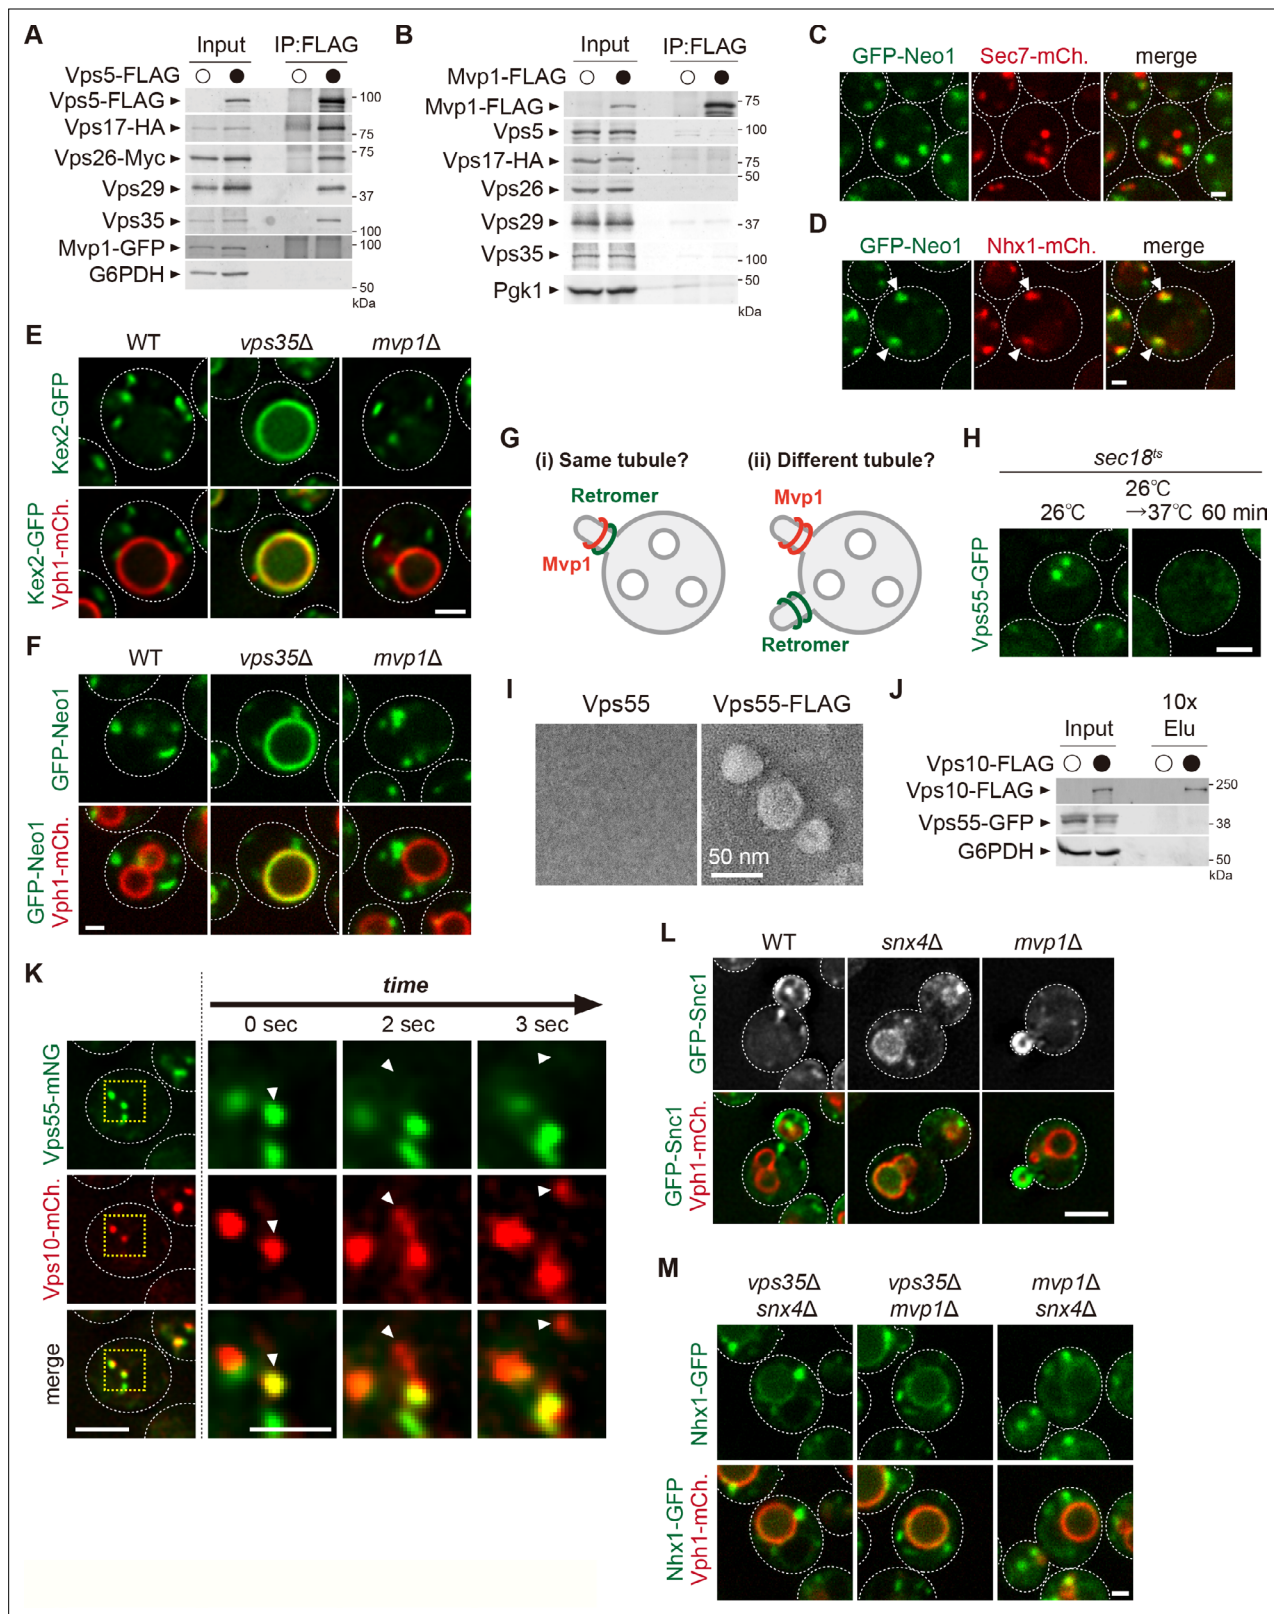

**Figure 5—figure supplement 1.** The analysis of the retromer pathway in Mvp1 mutants. **(A)** The association of Mvp1 with the retromer complex. Vps5-FLAG was immunoprecipitated (IP) from cells expressing Vps17-HA, Vps26-Myc, and Mvp1-GFP, and the IP products were analyzed by immunoblotting using antibodies against FLAG, hemagglutinin (HA), Myc, Vps29, Vps35, green fluorescent protein (GFP), and glucose-6-phosphate dehydrogenase (G6PDH). **(B)** Mvp1 binding to the retromer subunits. Mvp1-FLAG was immunoprecipitated from cells expressing Vps17-HA, and the IP products were

Figure 5—figure supplement 1 continued on next page

*Figure 5—figure supplement 1 continued*

analyzed by immunoblotting using antibodies against Vps5, HA, Vps26, Vps29, Vps35, and G6PDH. **(C and D)** Localization of GFP-Neo1 with Sec7-mCherry as a marker for the trans-Golgi **(C)** and Nhx1-mCherry as a marker for the endosome **(D)**. **(E and F)** Localization of Kex2-GFP **(E)** and GFP-Neo1 **(F)** in wild-type (WT), *vps35Δ*, and *mvp1Δ* cells. **(G)** Hypothesis of Mvp1-mediated recycling. **(H)** Vps55-GFP localization in *sec18<sup>ts</sup>* mutants at 26 °C or 37 °C for 60 min. **(I)** Electron microscopy (EM) analysis of the isolated Vps55-FLAG-containing structures. Vps55-FLAG-containing structures were immunoprecipitated from *sec18<sup>ts</sup>* mutants incubated at 37 °C for 1 hr, and then eluted using FLAG peptides. Eluted products were analyzed by negative-stain EM. **(J)** Immunoprecipitation of Vps10-containing vesicles. Vps10-FLAG-containing structures were immunoprecipitated from *sec18<sup>ts</sup>* mutants incubated at 37 °C for 1 hr, and the isolated structures were analyzed by immunoblotting using antibodies against FLAG, GFP, and G6PDH. **(K)** Live-cell imaging of Vps55-mNeonGreen and Vps10-mCherry. **(L)** GFP-Snc1 localization in WT, *snx4Δ*, and *mvp1Δ* cells. **(M)** Nhx1 localization in *vps35Δ snx4Δ*, *vps35Δ mvp1Δ*, and *snx4Δ mvp1Δ* cells. Scale bar: 1 μm.

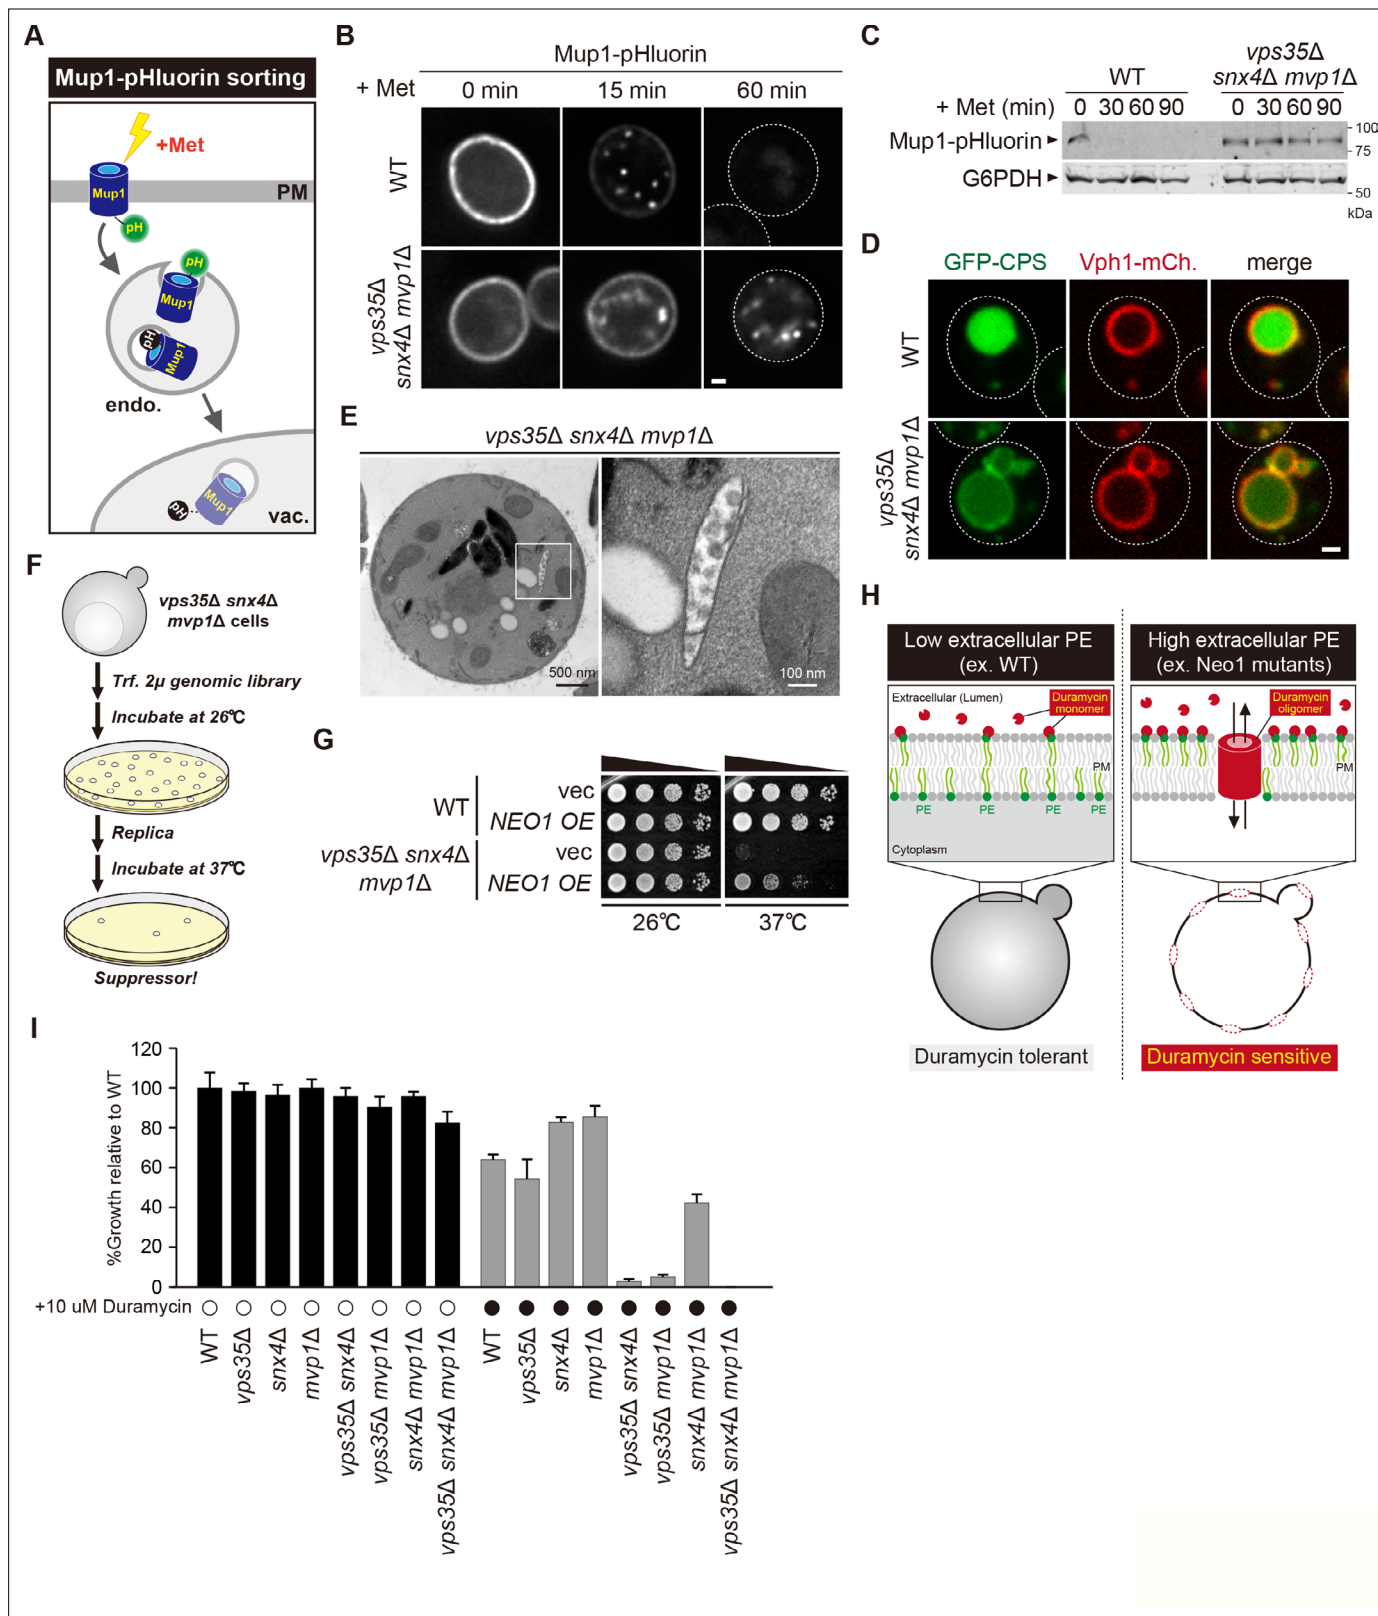

**Figure 6.** Retromer, Snx4, and Mvp1 complexes are required for proper function of the endosome. (A) Schematic of Mup1-pHluorin sorting. (B) Mup1-pHluorin localization in wild-type (WT) and *vps35Δ snx4Δ mvp1Δ* cells. Cells expressing Mup1-pHluorin were grown to mid-log phase and stimulated with 20 μg/ml methionine. Scale bar: 1 μm. (C) Mup1-pHluorin processing in WT and *vps35Δ snx4Δ mvp1Δ* cells. Mup1 sorting was stimulated as in B. (D) GFP-CPS sorting in WT and *vps35Δ snx4Δ mvp1Δ* cells. (E) Thin-section electron microscopy (EM) of an endosome in *vps35Δ snx4Δ mvp1Δ* cells.

Figure 6 continued on next page

Figure 6 continued

cells. **(F)** Schematic of screening for multicopy suppressors of *vps35Δ snx4Δ mvp1Δ* triple mutants. **(G)** Growth of *vps35Δ snx4Δ mvp1Δ* triple mutants overexpressing Neo1. **(H)** Schematic of duramycin assay to evaluate extracellular phosphatidylethanolamine (PE). **(I)** Growth of recycling mutants in the presence of duramycin.



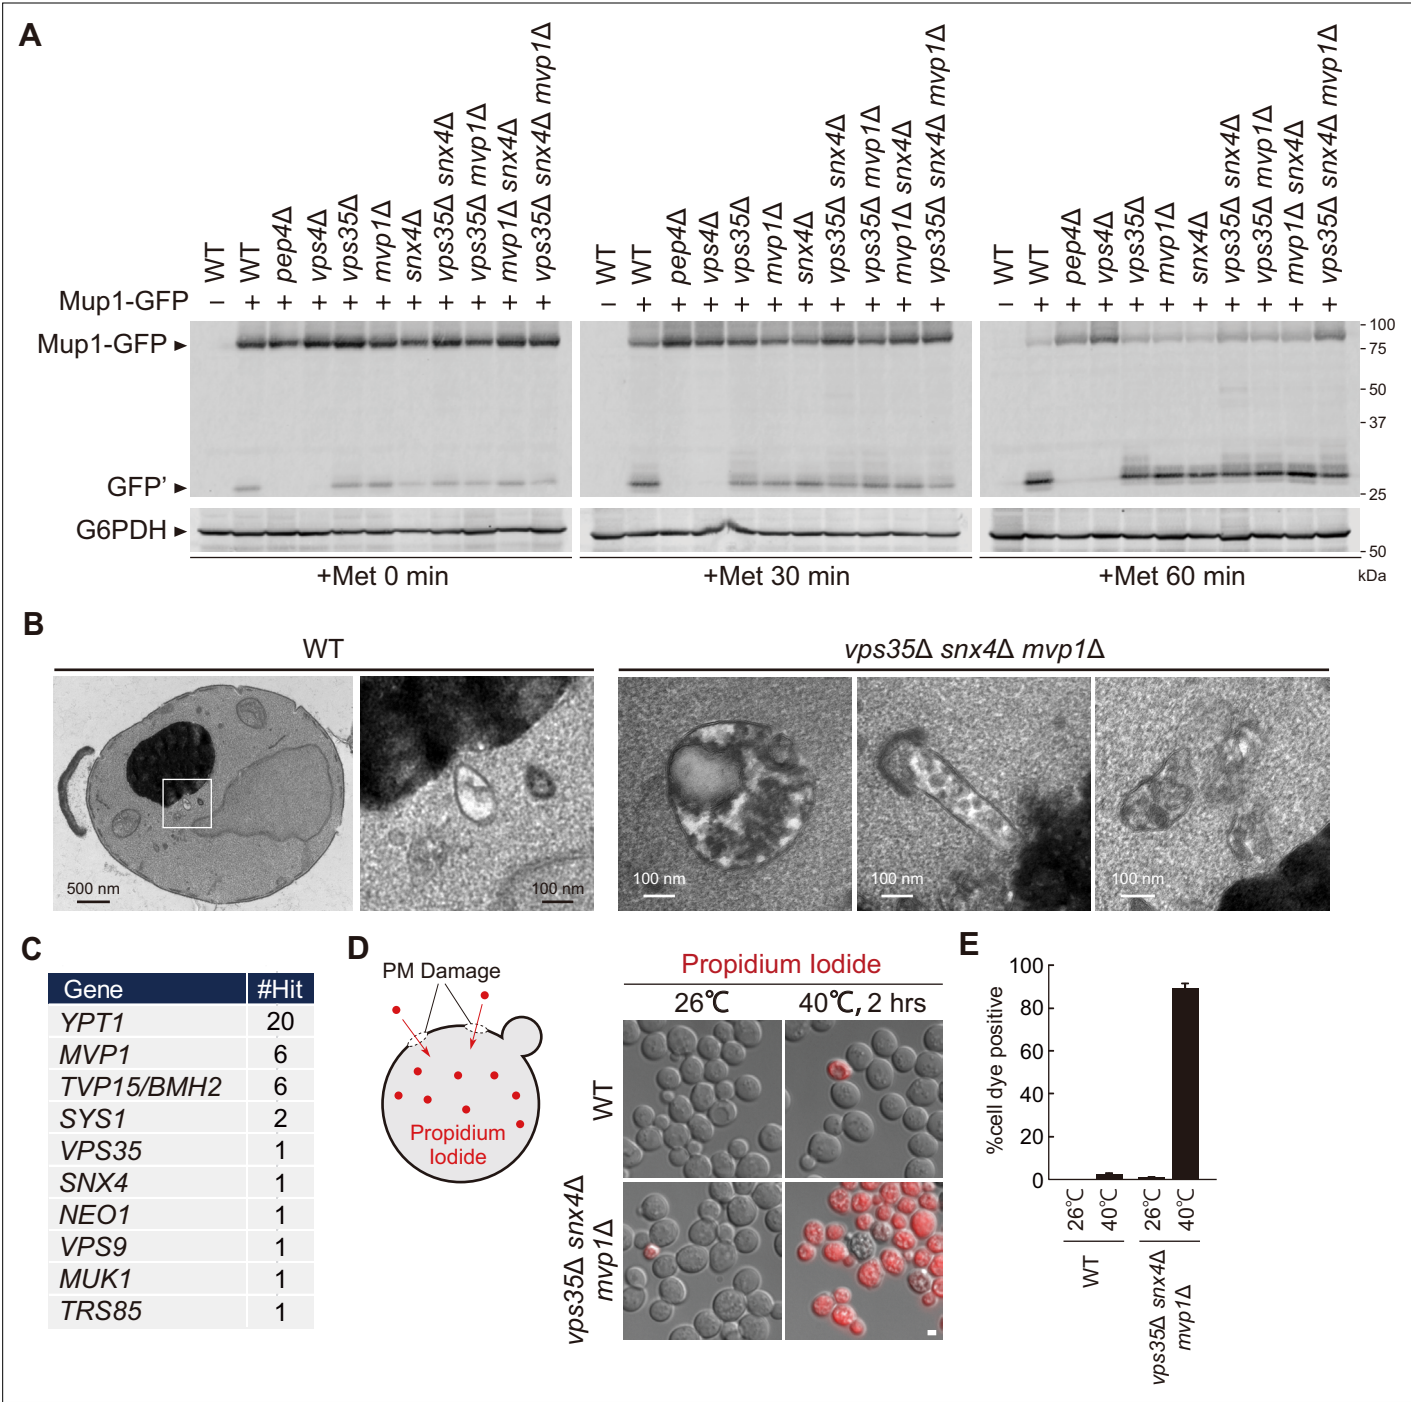

**Figure 6—figure supplement 1.** The analysis of triple recycling pathway mutants. **(A)** Mup1-GFP sorting in SNX-BAR mutants. Mup1 sorting was stimulated as in **Figure 6B**. **(B)** Thin-section electron microscopy (EM) of endosomes in wild-type (WT) and *vps35Δ snx4Δ mvp1Δ* cells. **(C)** Summary of identified multicopy suppressors from **Figure 6F**. **(D)** Schematic for the plasma membrane (PM) integrity assay for WT and *vps35Δ snx4Δ mvp1Δ* triple mutants. **(E)** Quantitation of propidium iodide-stained cells from **D**.

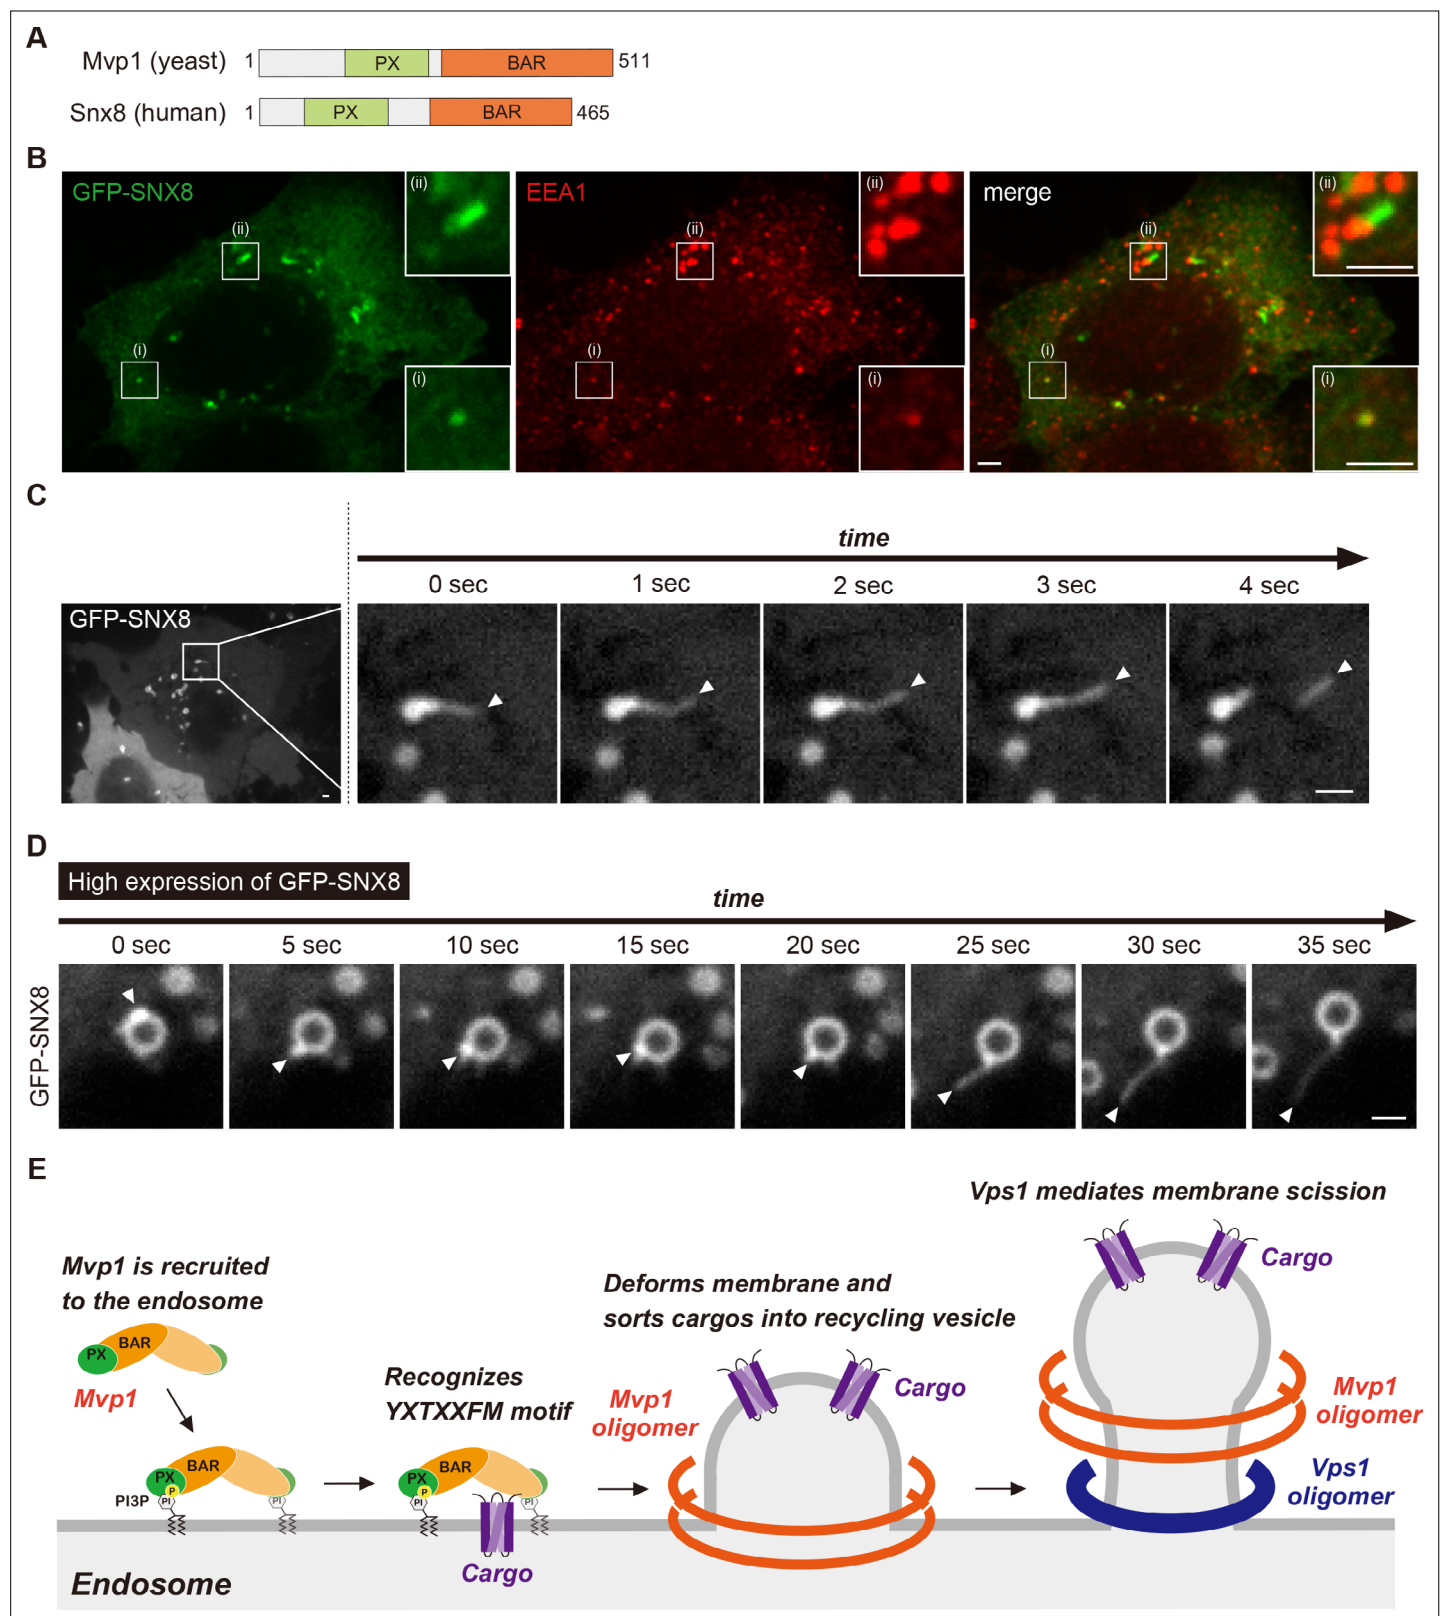

**Figure 7.** Mvp1-mediated endosomal recycling is evolutionarily conserved. **(A)** Schematic of Mvp1 and Snx8. **(B)** Immunofluorescence of GFP-SNX8-expressing HeLa cells, with EEA1 serving as an endosomal marker. **(C)** Live-cell imaging of GFP-SNX8. **(D)** Live-cell imaging of highly expressed GFP-SNX8. **(E)** Model of Mvp1-mediated endosomal recycling. Scale bar: 1  $\mu$ m.

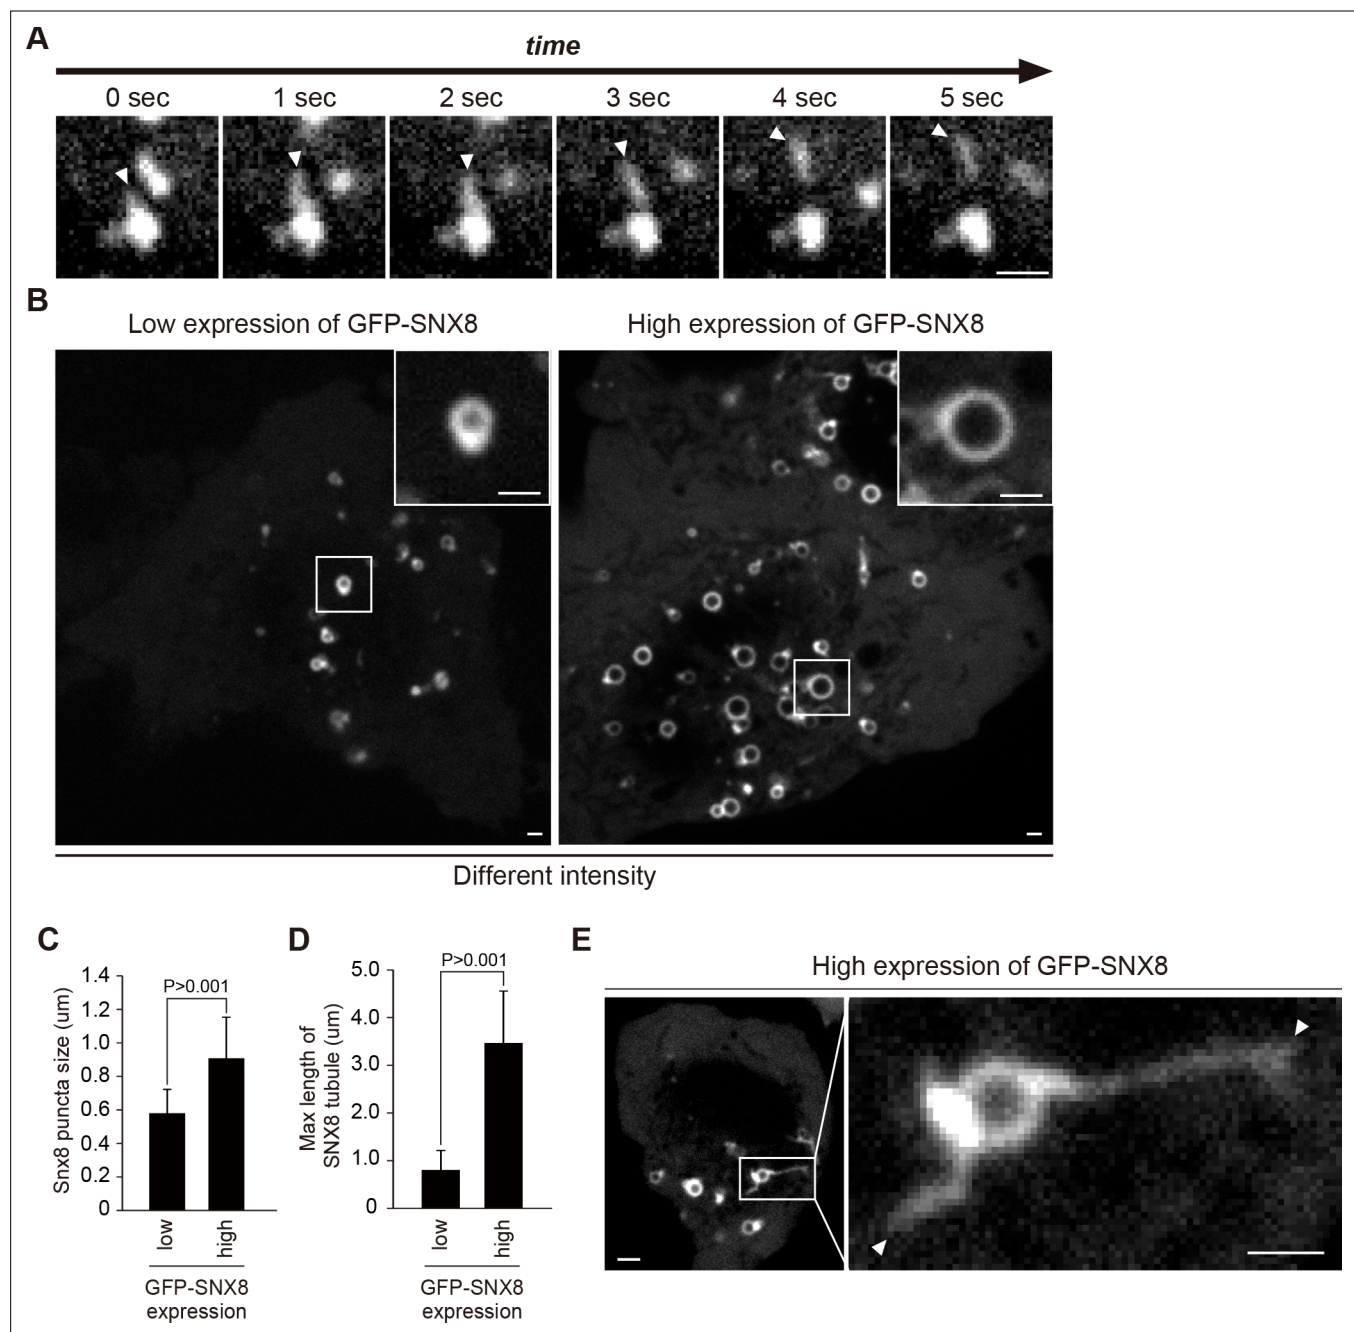

**Figure 7—figure supplement 1.** The analysis of GFP-SNX8 tubule structure. **(A)** Live-cell imaging of GFP-SNX8. **(B)** GFP-SNX8 localization of HeLa cells expressing GFP-SNX8 at low or high levels. **(C and D)** Quantification of SNX8 puncta size **(C)** or max length of SNX8 tubule **(D)** from **B**. **(E)** GFP-SNX8 tubule structures in GFP-SNX8 highly expressing cells. Scale bar: 1 μm.

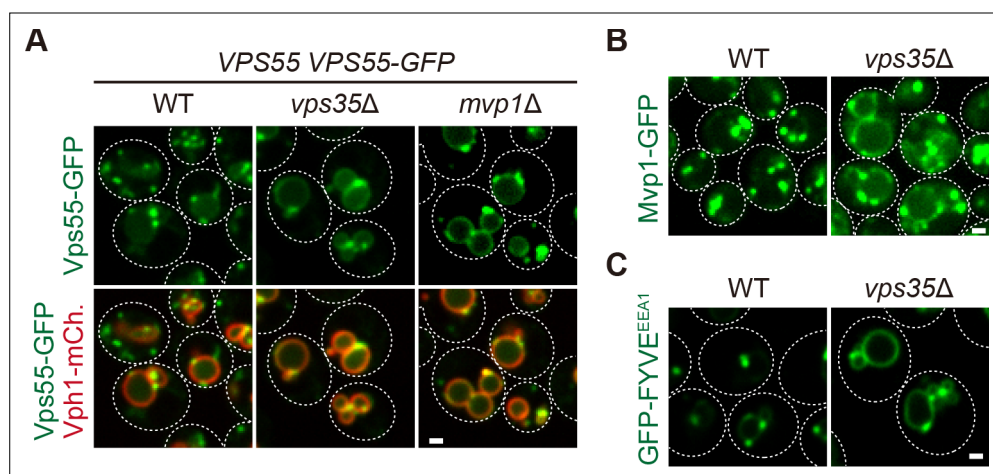

**Figure 7—figure supplement 2.** Highly expressed Vps55 is mislocalized in the retromer mutants. **(A)** Vps55-GFP localization in cells expressing both Vps55 and Vps55-GFP. **(B)** Mvp1-GFP localization in wild-type (WT) and *vps35Δ* cells. **(C)** GFP-2xFYVE localization in WT and *vps35Δ* cells. Scale bar: 1 μm.
